# Supplementary material for: A viral ADP-ribosyltransferase attaches RNA chains to host proteins
Source: PubMed Central journal article supplement (PMC10468400; doi:10.1038/s41586-023-06429-2), 2023-08-16
Supplement: 41586_2023_6429_MOESM1_ESM.pdf [file 41586_2023_6429_MOESM1_ESM.pdf]

---

**Supplementary information**

---

**A viral ADP-ribosyltransferase attaches RNA chains to host proteins**

---

In the format provided by the authors and unedited

---

**Supplementary information**

---

**A viral ADP-ribosyltransferase attaches RNA chains to host proteins**

---

In the format provided by the authors and unedited

# SUPPLEMENTARY INFORMATION

## **A viral ADP-ribosyltransferase attaches RNA chains to host proteins**

Maik Wolfram-Schauerte<sup>1,2+</sup>, Nadiia Pozhydaieva<sup>1</sup>, Julia Grawenhoff<sup>2</sup>, Luisa M. Welp<sup>3,4</sup>, Ivan Silber<sup>3,4</sup>, Alexander Wulf<sup>3</sup>, Franziska A. Billau<sup>2</sup>, Timo Glatter<sup>1</sup>, Henning Urlaub<sup>3,4</sup>, Andres Jäschke<sup>2\*</sup>, Katharina Höfer<sup>1,2,5\*+</sup>

1 Max Planck Institute for Terrestrial Microbiology, 35043 Marburg, Germany.

2 Institute of Pharmacy and Molecular Biotechnology (IPMB), Heidelberg University, 69120 Heidelberg, Germany

3 Max Planck Institute for Multidisciplinary Sciences, 37077 Göttingen, Germany.

4 Institute of Clinical Chemistry, University Medical Center, 37075, Göttingen, Germany.

5 SYNMIKRO, Center for Synthetic Microbiology, 35043 Marburg, Germany

+ These authors contributed equally to this work.

\* Corresponding authors: Andres Jäschke, PhD, [jaeschke@uni-hd.de](mailto:jaeschke@uni-hd.de); Katharina Höfer, PhD, [Katharina.Hoefer@synmikro.mpi-marburg.mpg.de](mailto:Katharina.Hoefer@synmikro.mpi-marburg.mpg.de)

## SUPPLEMENTARY INFORMATION – TABLE OF CONTENTS

|                                                                                                                                                                        |    |
|------------------------------------------------------------------------------------------------------------------------------------------------------------------------|----|
| <b>Supplementary Figure 1:</b> Raw gel and blot images used for figures in this study.                                                                                 | 3  |
| <b>Supplementary Figure 2:</b> Statistical data on the Alphafold prediction model of ModB structure shown in Extended Data Fig. 1f.                                    | 39 |
| <b>Supplementary Figure 3:</b> IGV coverage plots for RNAylomeSeq data.                                                                                                | 40 |
| <b>Supplementary Figure 4:</b> Statistical tests for phenotype of T4 phage ModB R73A, G74A mutant shown in Fig. 5 c-e.                                                 | 40 |
| <b>Legend for Supplementary Table 1:</b> MaxQuant Output for LC-MS/MS analysis of endogenously His-tagged rS1 from T4 phage-infected <i>E. coli</i> B strain.          | 41 |
| <b>Legend for Supplementary Table 2:</b> MaxQuant Output for LC-MS/MS analysis of His-tagged rS1-WT, -R139A and -R139K mutants from T4 phage-infected <i>E. coli</i> . | 41 |
| <b>Legend for Supplementary Table 3:</b> <i>In vitro</i> ADP-ribosylation and RNAylation sites in rS1 protein as identified by LC-MS/MS analysis.                      | 41 |
| <b>Legend for Supplementary Table 4:</b> Genes identified to contribute to the RNAylome by RNAylomeSeq.                                                                | 41 |
| <b>Legend for Supplementary Table 5:</b> MaxQuant Output for LC-MS/MS analysis of <i>E. coli</i> cell lysate with addition of ModB to various concentrations.          | 41 |
| <b>Legend for Supplementary Table 6:</b> <i>In vitro</i> ADP-ribosylation and RNAylation sites in rL2 protein as identified by LC-MS/MS analysis.                      | 42 |
| <b>Supplementary Table 7:</b> RNAs used in this study.                                                                                                                 | 43 |
| <b>Supplementary Table 8:</b> Genomic DNA sequence of ARTs, rS1 variants and ADP-ribose hydrolases.                                                                    | 44 |
| <b>Supplementary Table 9:</b> Primers used in this study.                                                                                                              | 51 |
| <b>Supplementary Table 10:</b> Strains and plasmids used in this study.                                                                                                | 56 |
| <b>References</b>                                                                                                                                                      | 57 |

Supplementary Figure 1: Raw gel and blot images used for figures in this study.

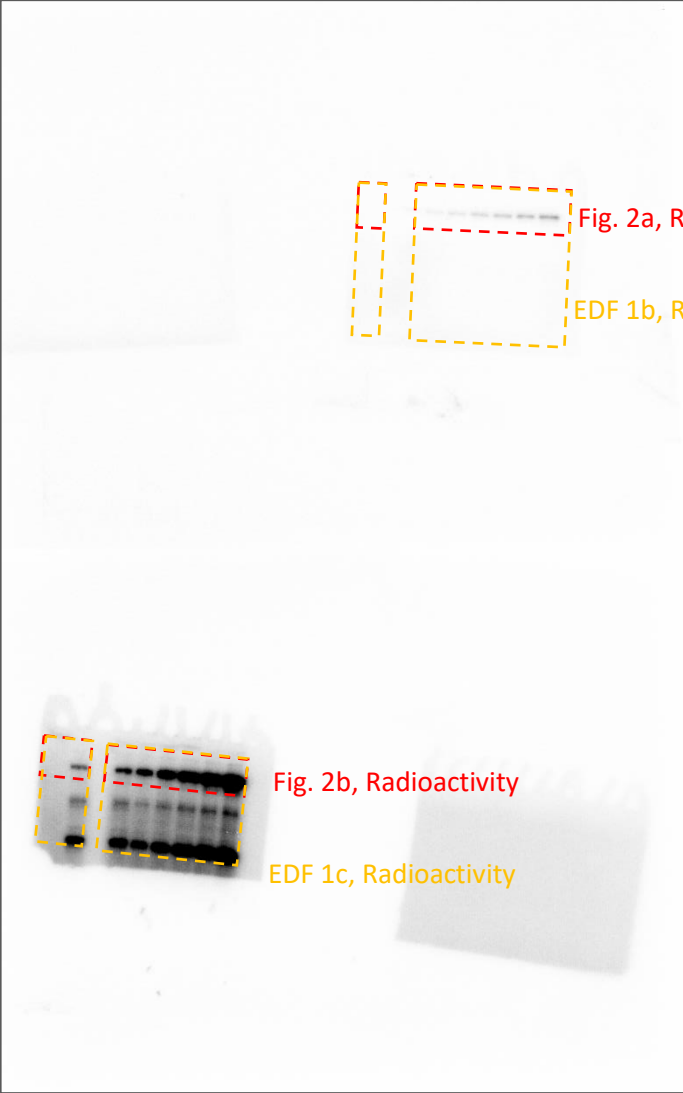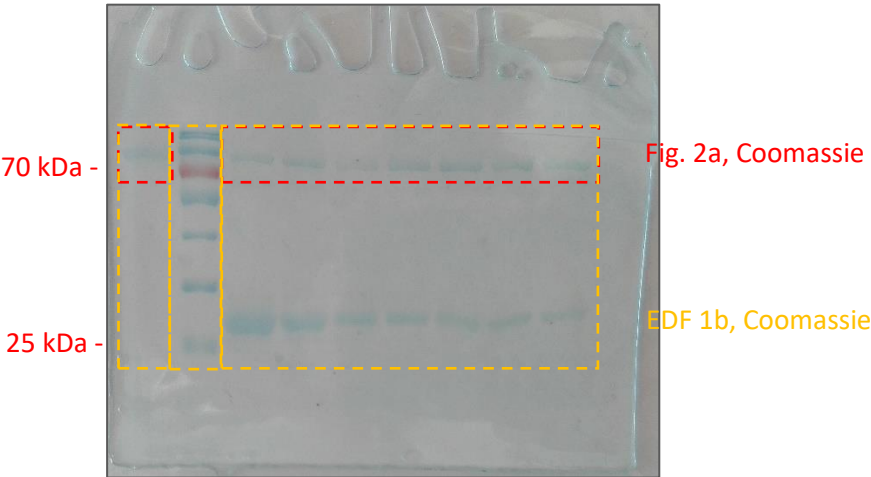

Used in Fig. 2a,b (red) and Extended Data Fig. 1b,c (yellow)

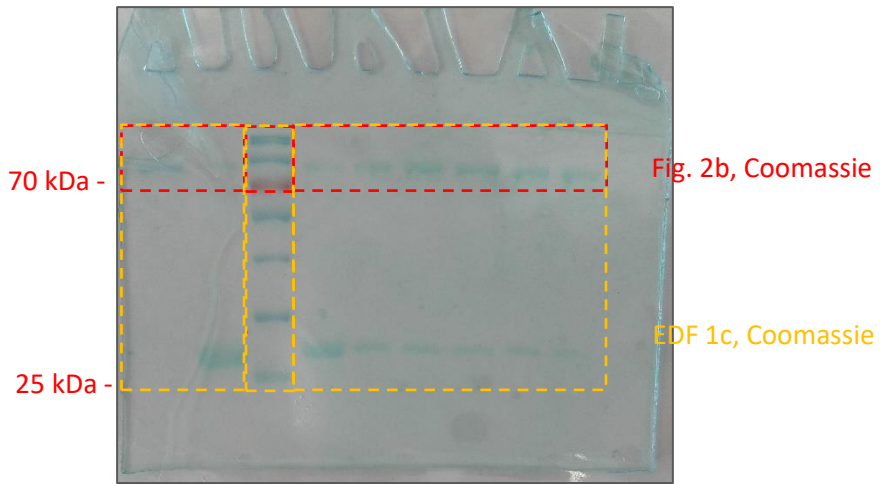

Used in Fig. 2a,b (red) and Extended Data Fig. 1b,c (yellow)

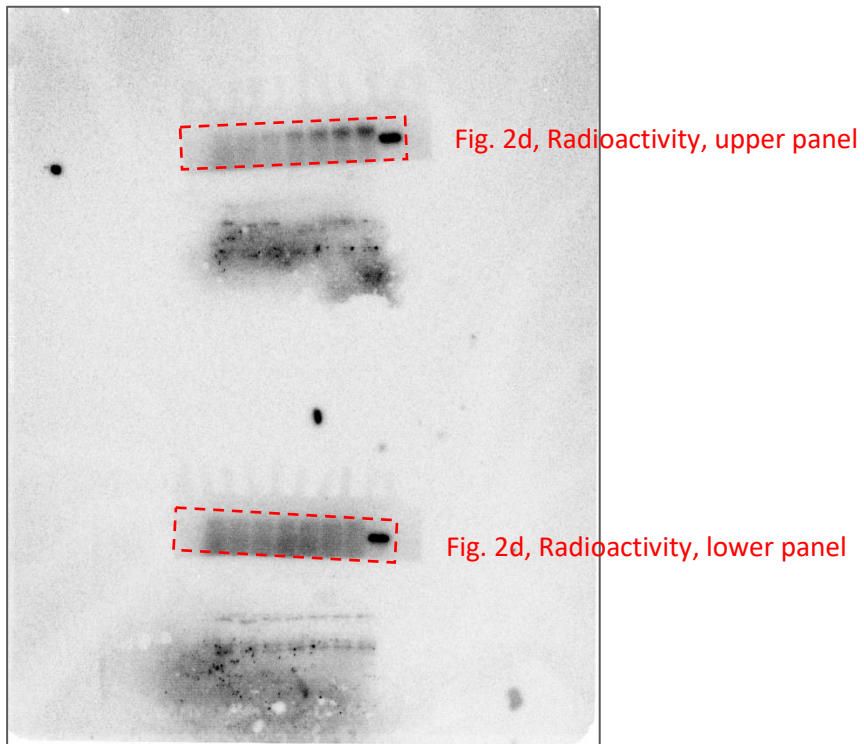

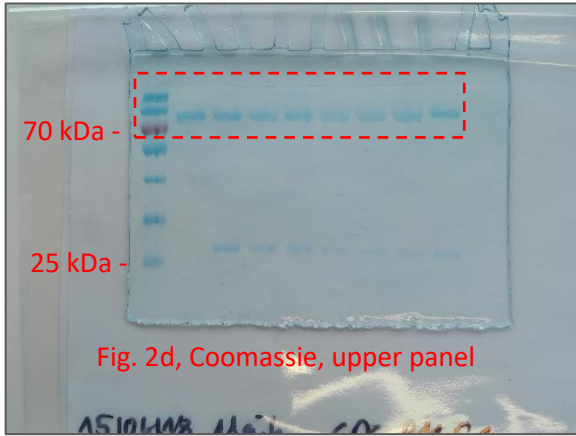

Fig. 2d, Coomassie, upper panel

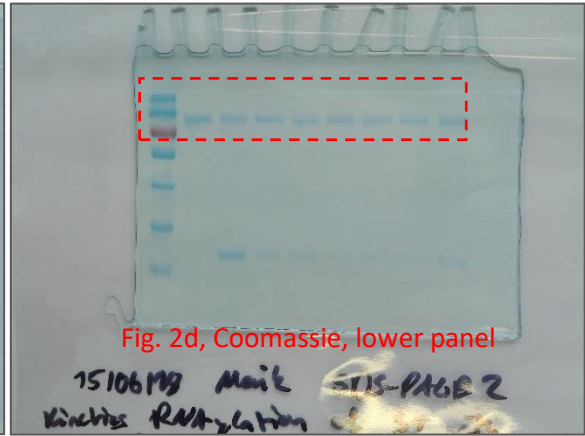

Fig. 2d, Coomassie, lower panel

Used in Fig. 2d

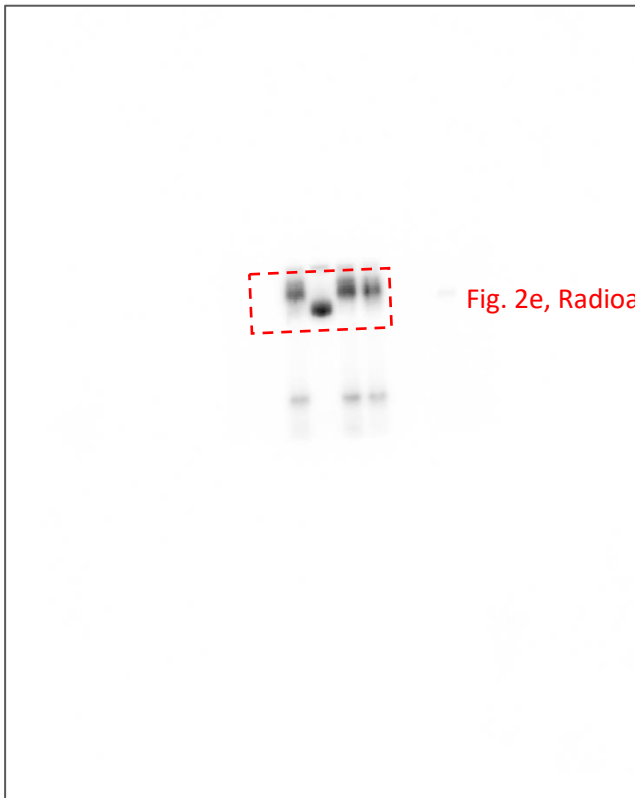

Fig. 2e, Radioactivity

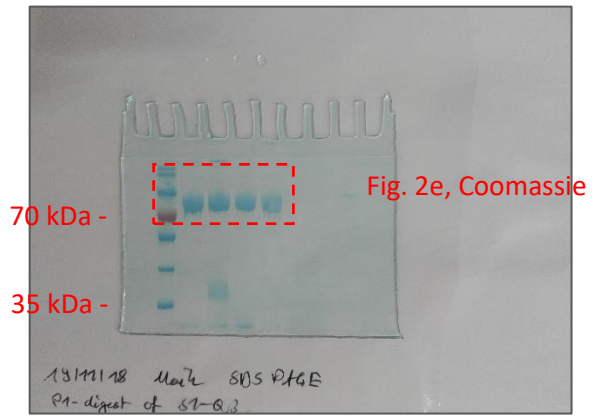

Used in Fig. 2e, right panel

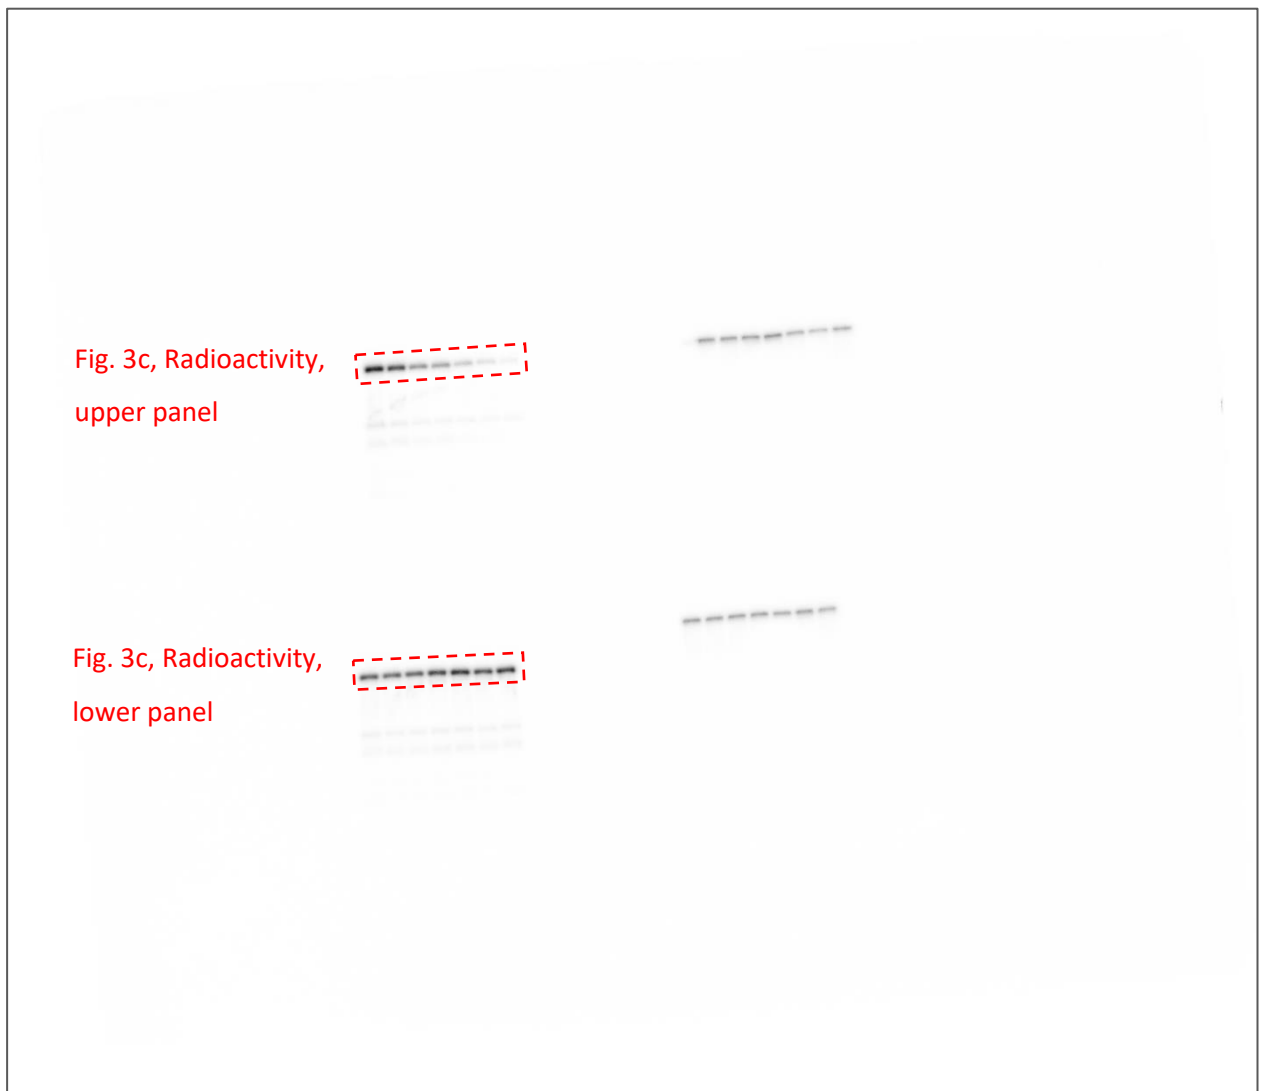



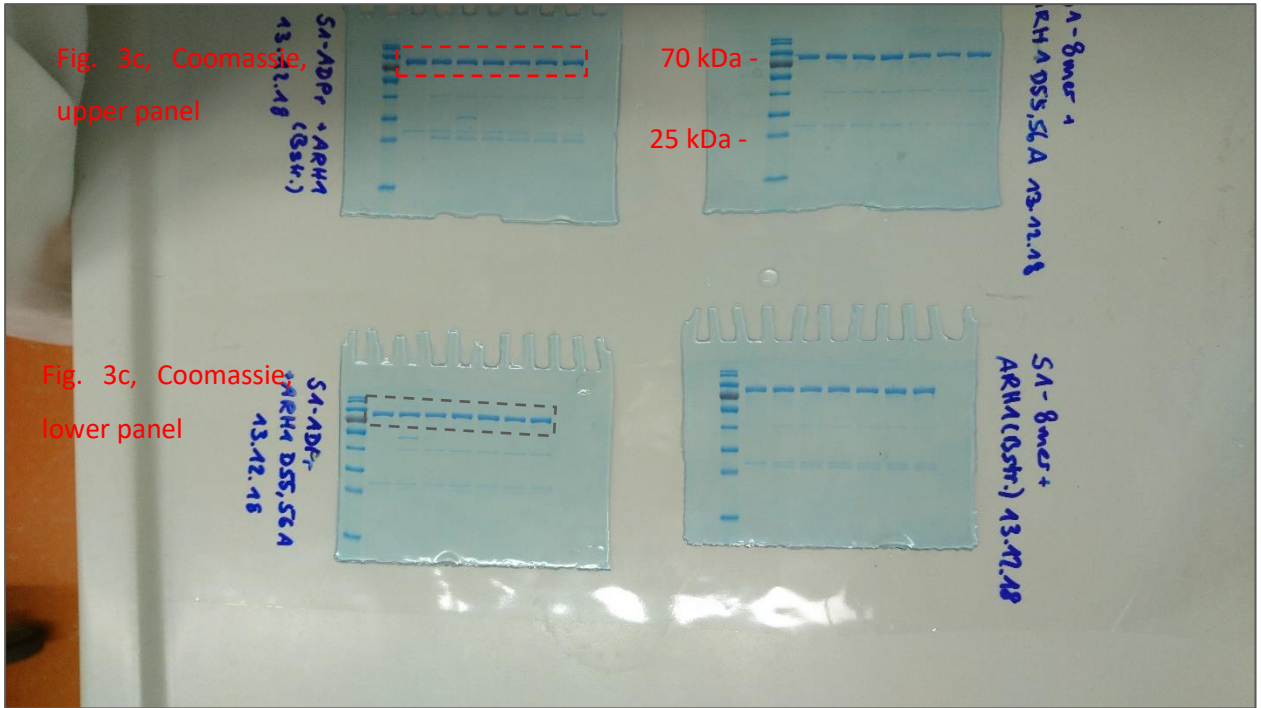

Used in Fig. 3c

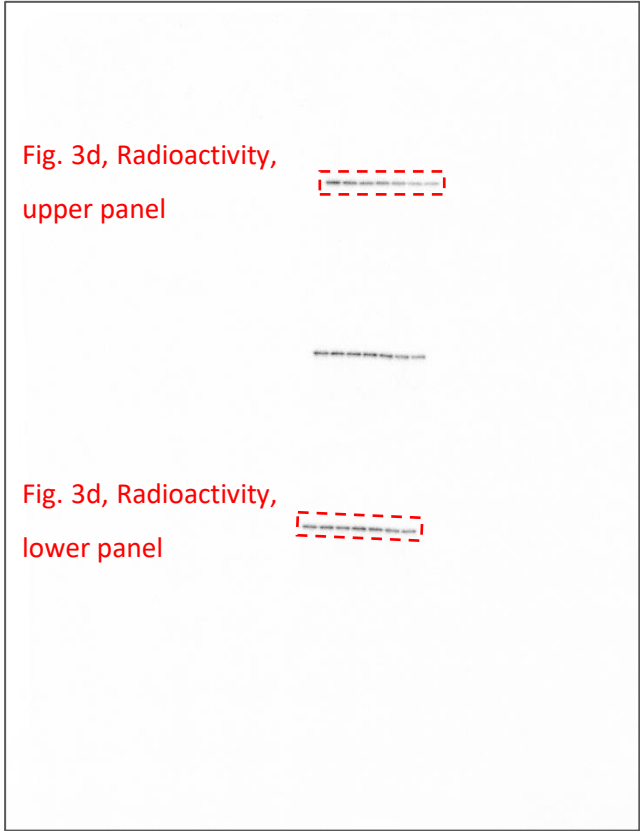

Fig. 3d, Coomassie,  
upper panel

70 kDa -  
25 kDa -

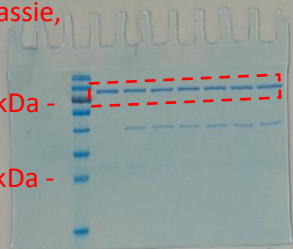

S1-8mer + ARH1  
(BL21DE3)  
18.12.18

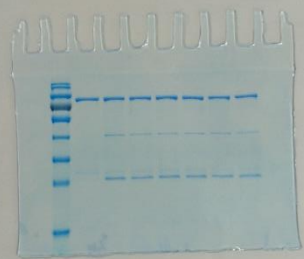

S1-8mer + ARH1  
(BL21DE3) (5000x)  
18.12.18

Fig. 3d, Coomassie,  
lower panel

70 kDa -  
25 kDa -

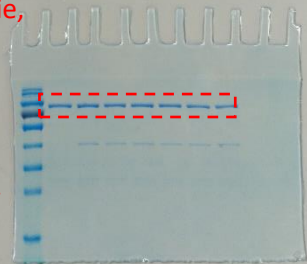

S1-8mer + ARH1  
DSS, SEA 18.12.

Used in Fig. 3d

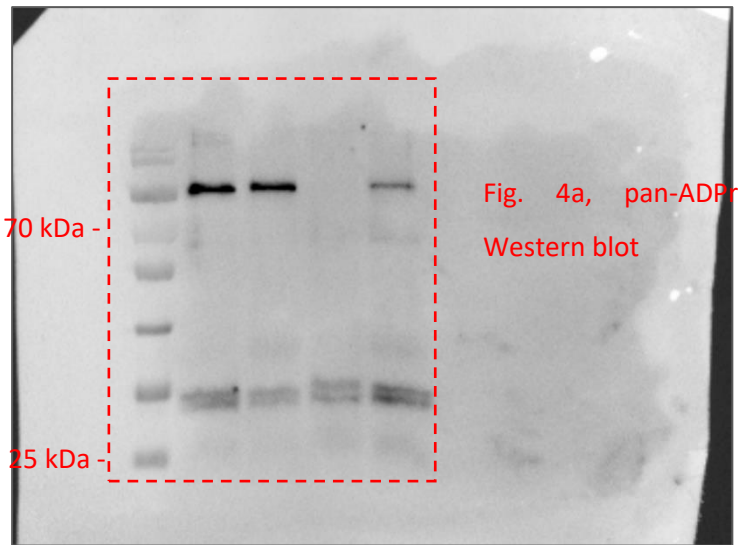

Used in Fig. 4a

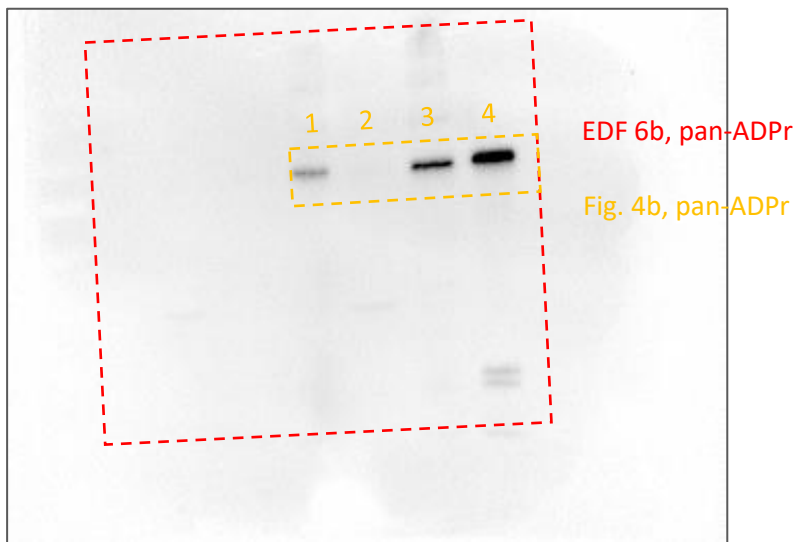

Used in Fig. 4b (yellow) and EDF 6b (red)

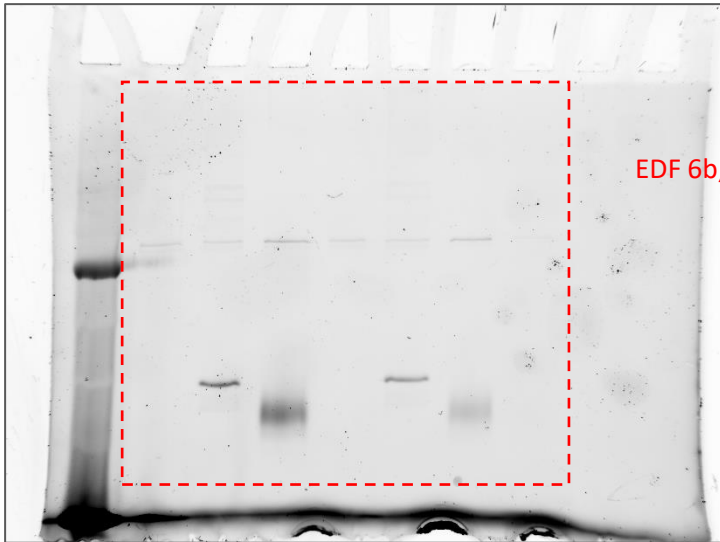

Used in EDF 6b

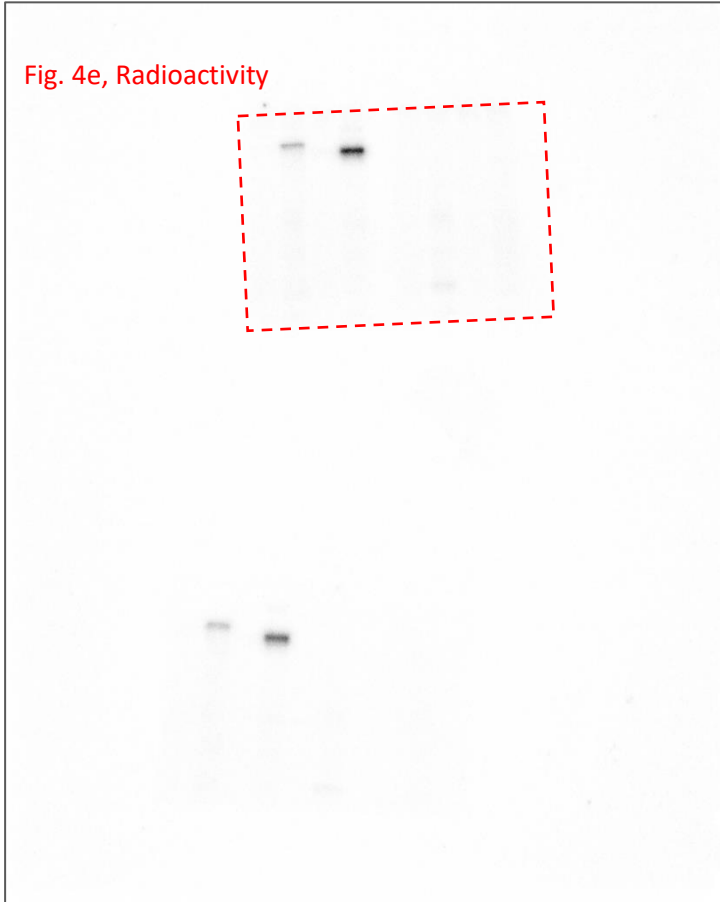

Used in Fig. 4e

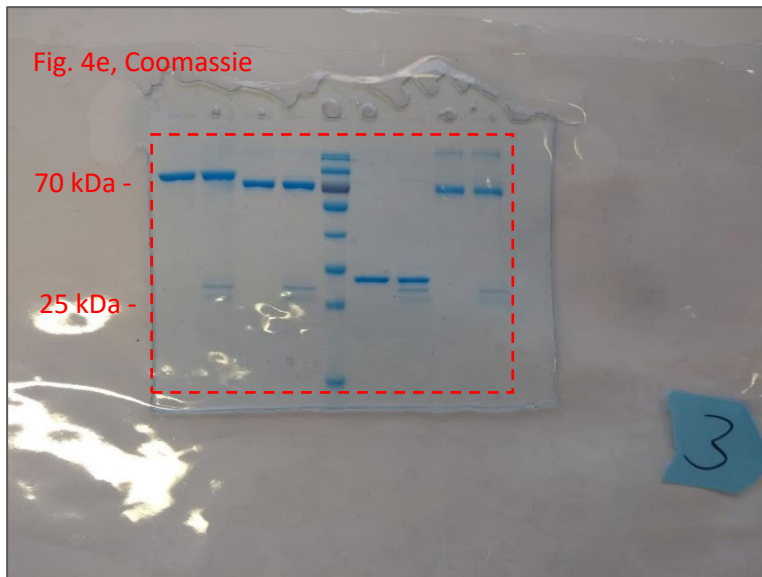

Used in Fig. 4e

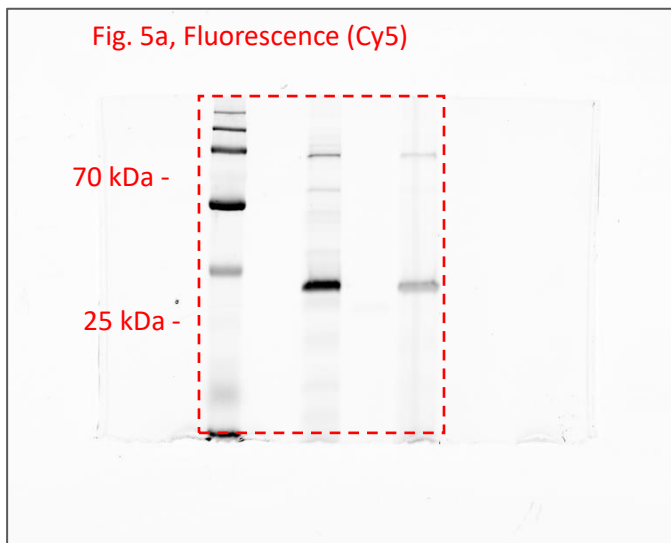

Used in Fig. 5a

Fig. 5a, Coomassie

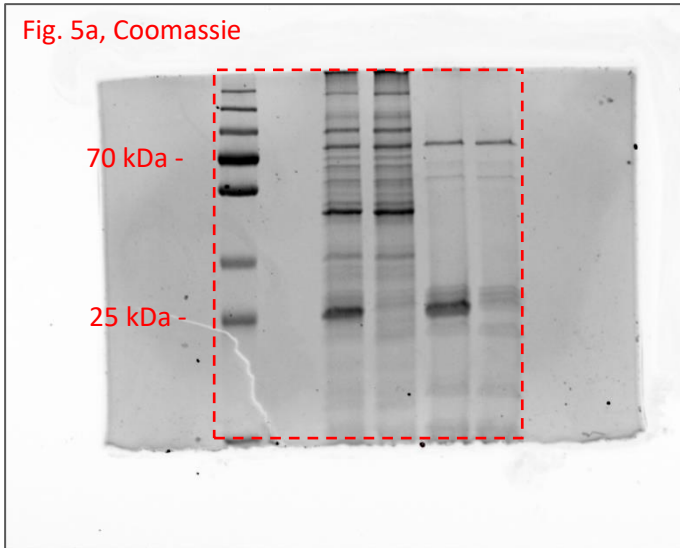

Used in Fig. 5a

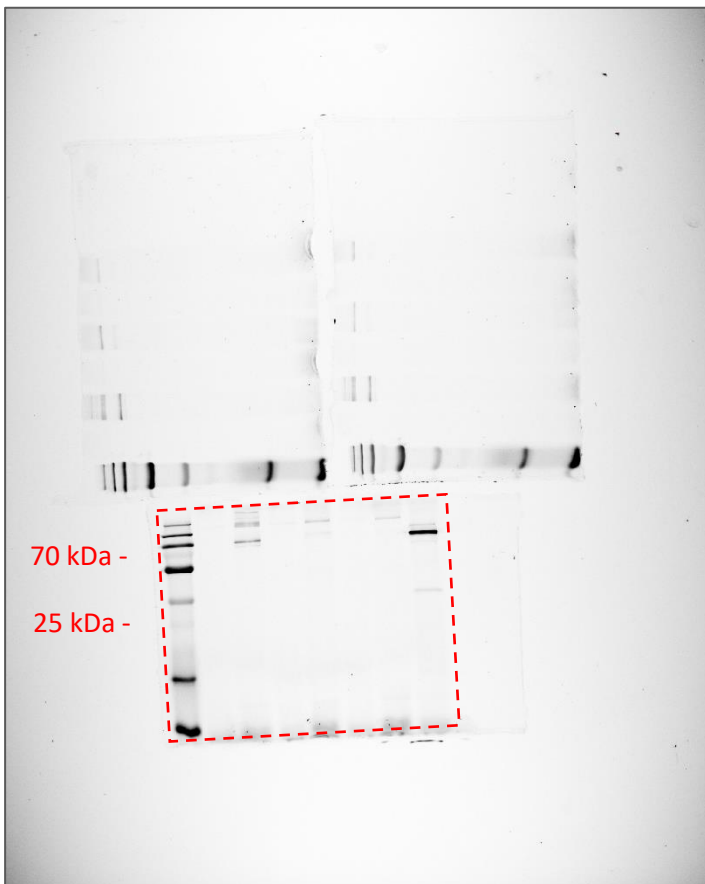

EDF 1a, Fluorescence (Cy5),  
middle panel

Used in Extended Data Fig. 1a, middle panel

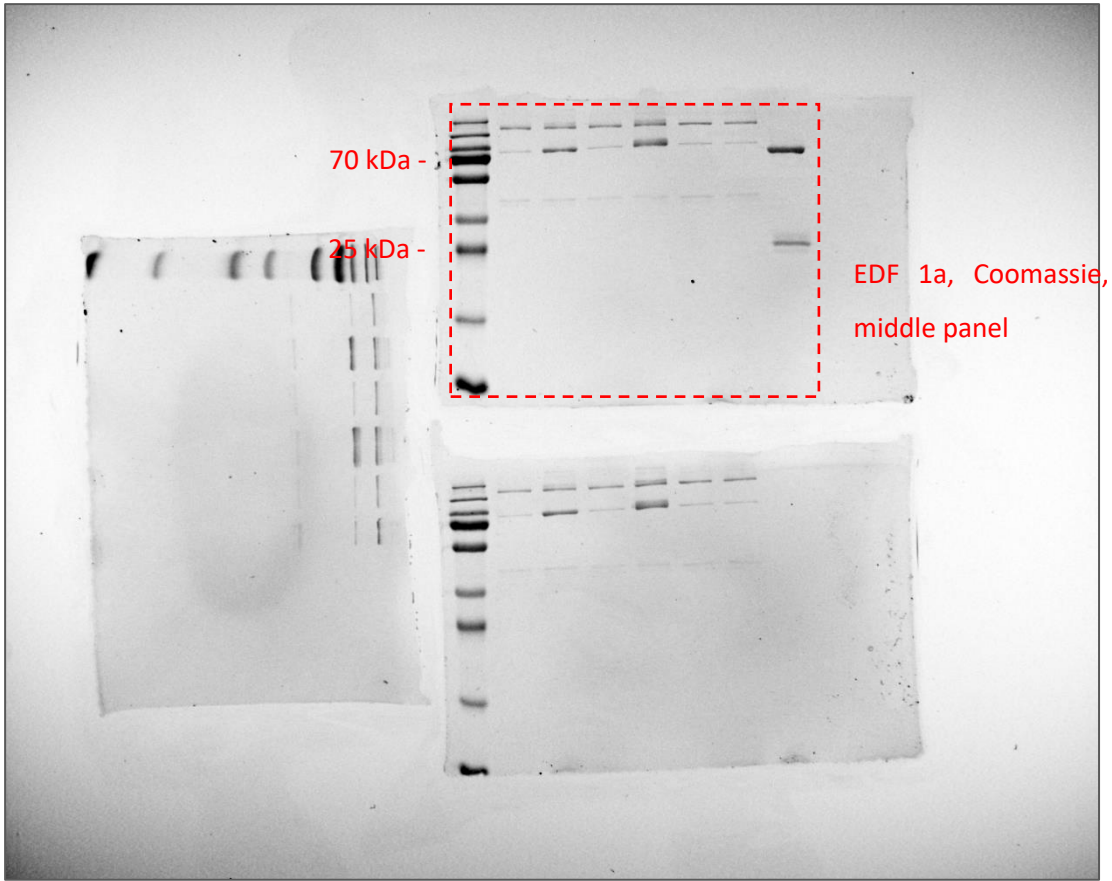

Used in Extended Data Fig. 1a, middle panel

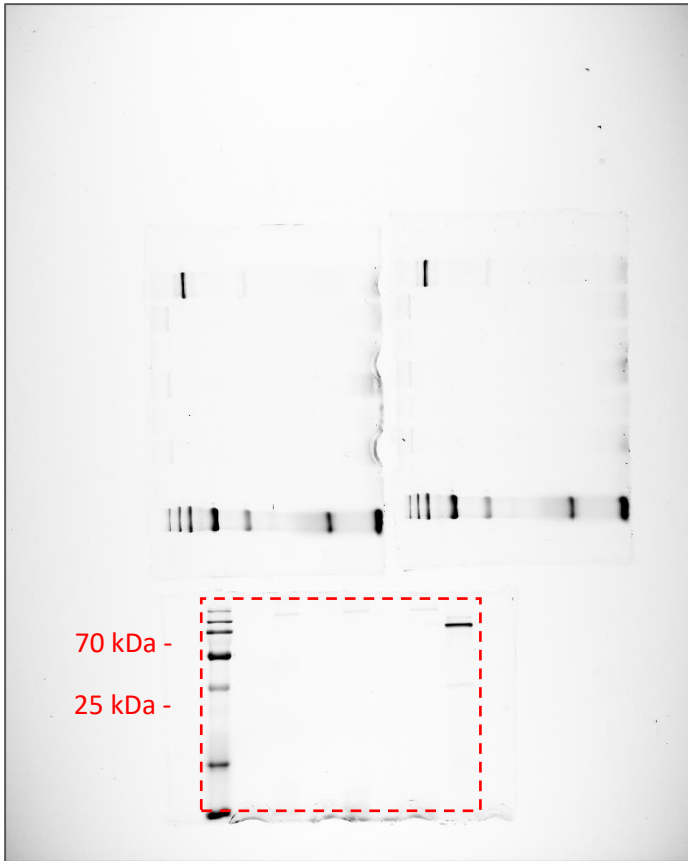

EDF 1a, Fluorescence (Cy5),  
lower panel

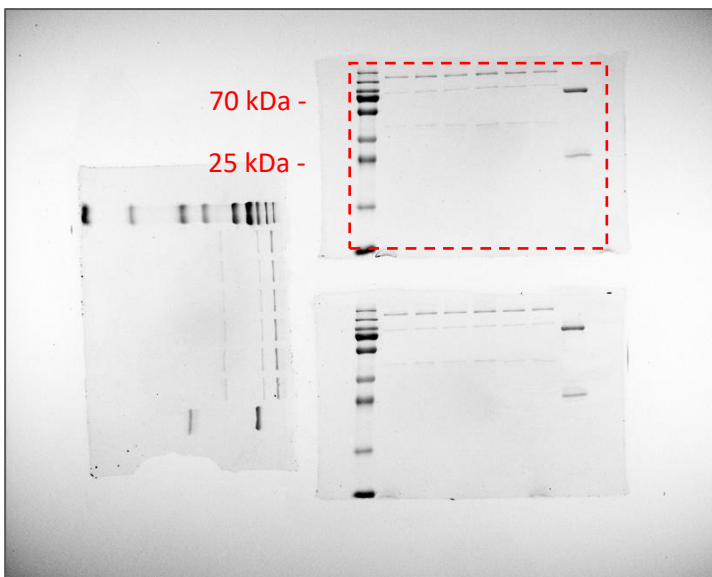

EDF 1a, Coomassie,  
lower panel

Used in Extended Data Fig. 1a, lower panel



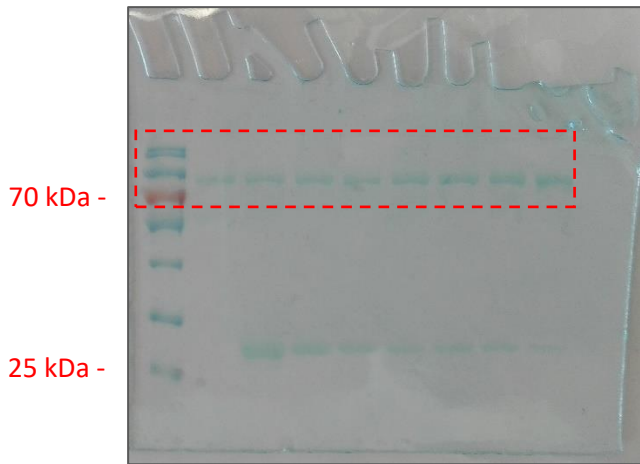

EDF 1d, Coomassie,  
upper panel

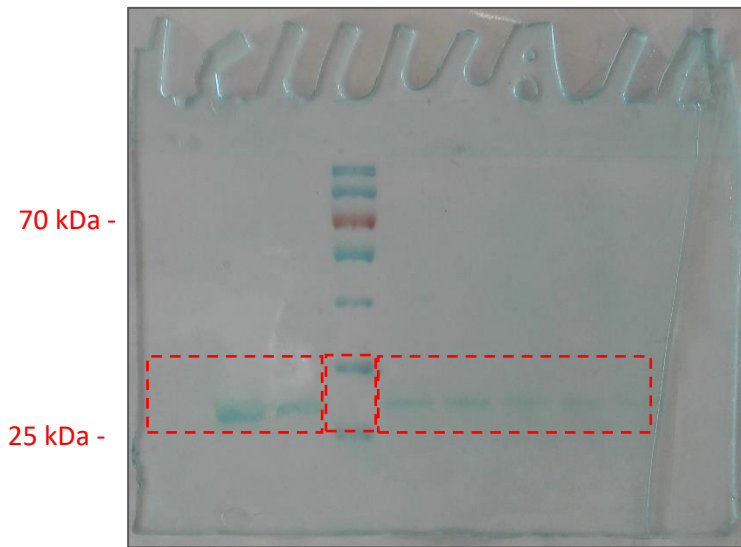

EDF 1d, Coomassie,  
middle panel

Used in Extended Data Fig. 1d, upper and middle panel

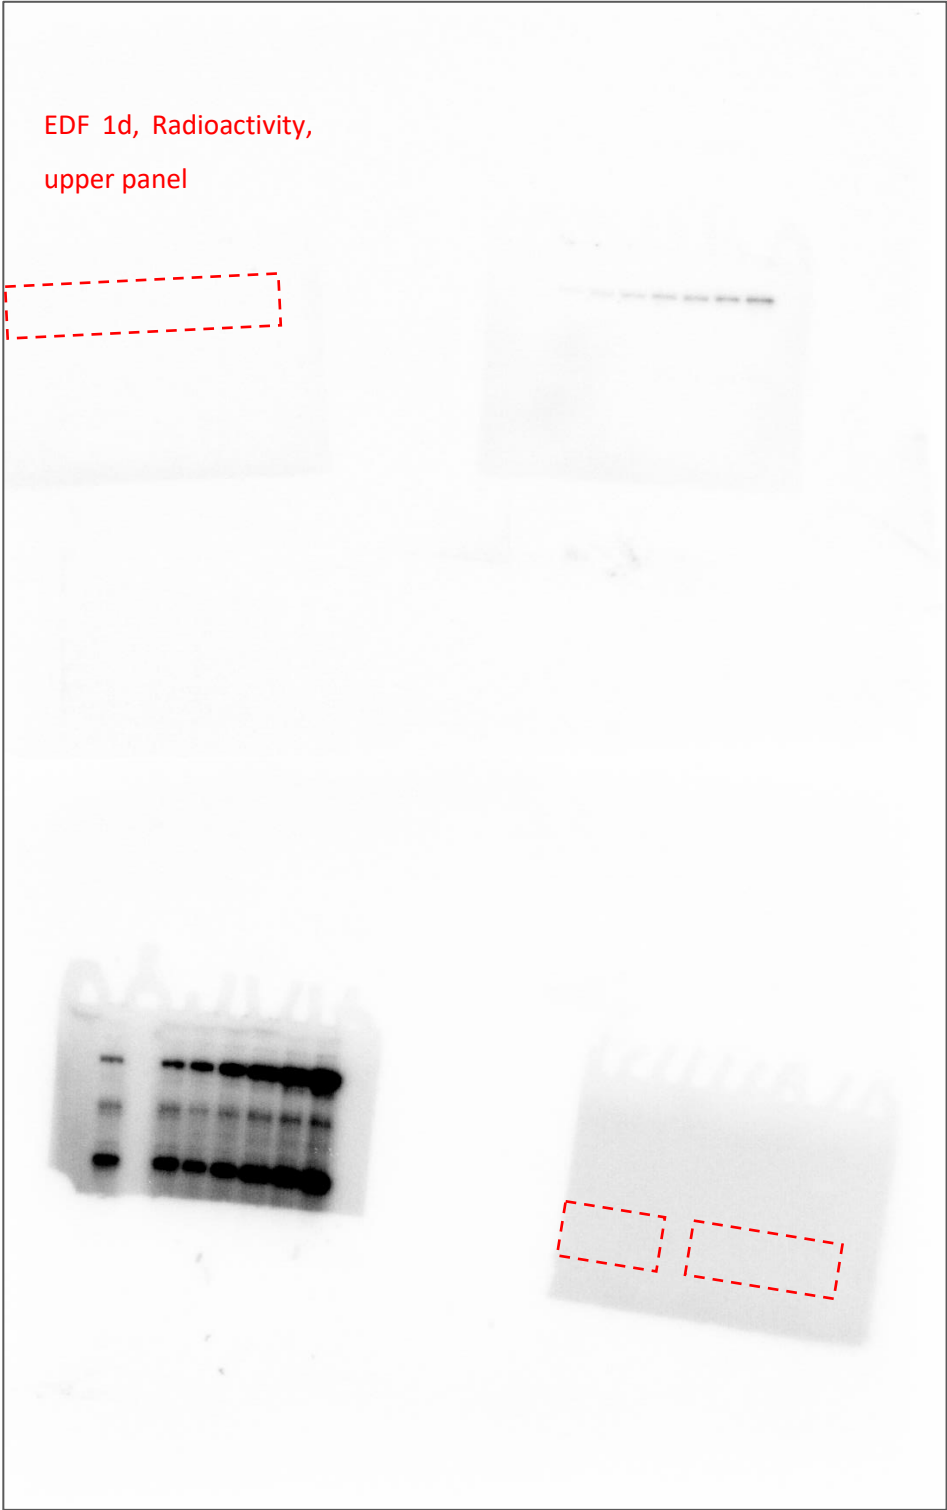

EDF 1d, Radioactivity,  
upper panel

EDF 1d, Radioactivity,  
middle panel

Used in Extended Data Fig. 1d, upper and middle panel

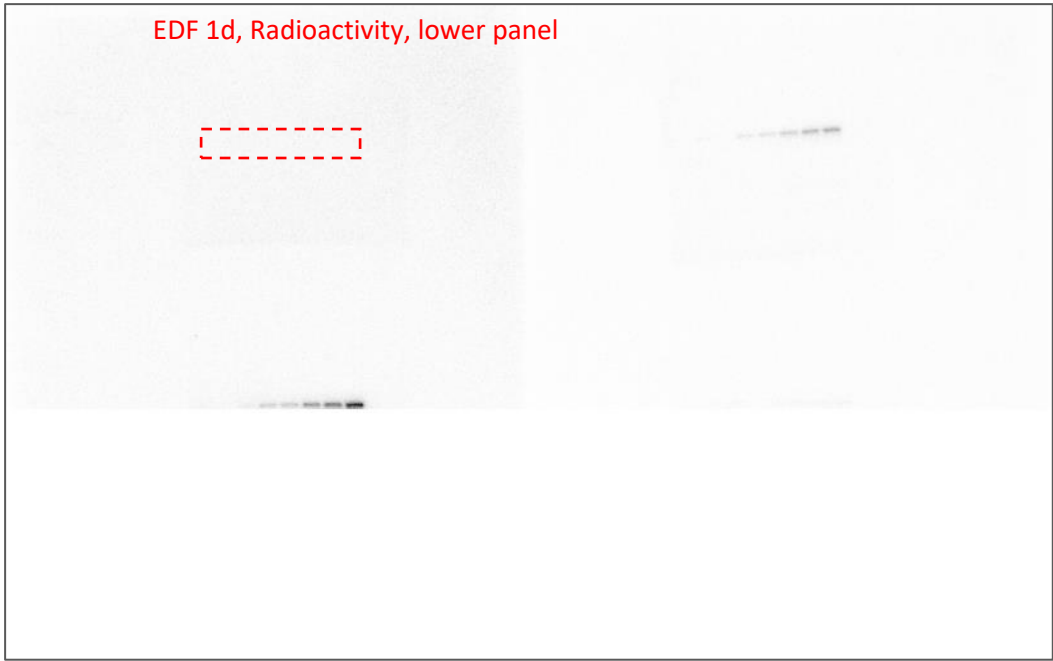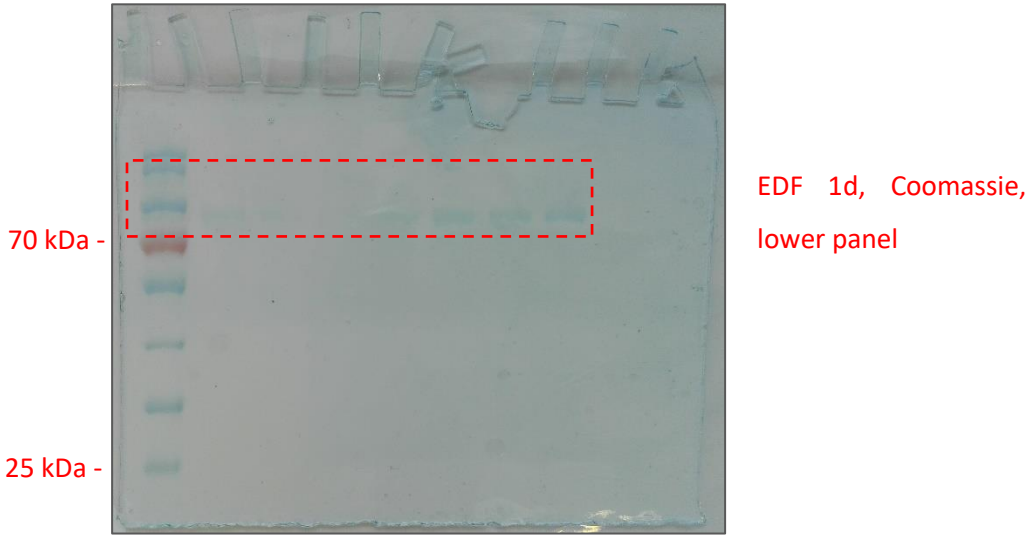

Used in Extended Data Fig. 1d, lower panel

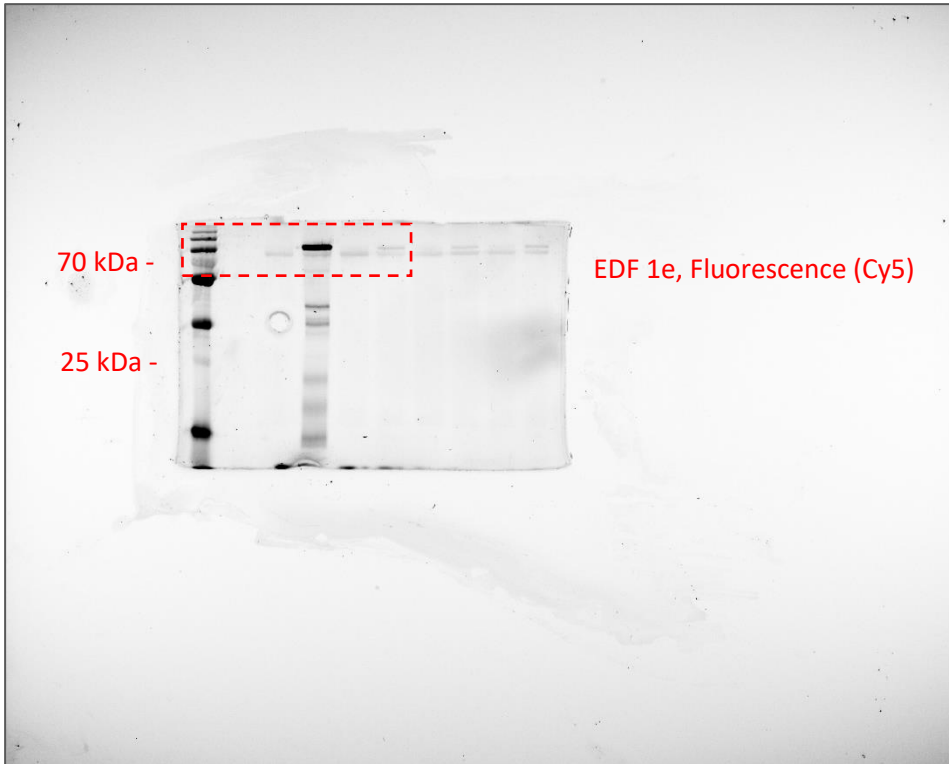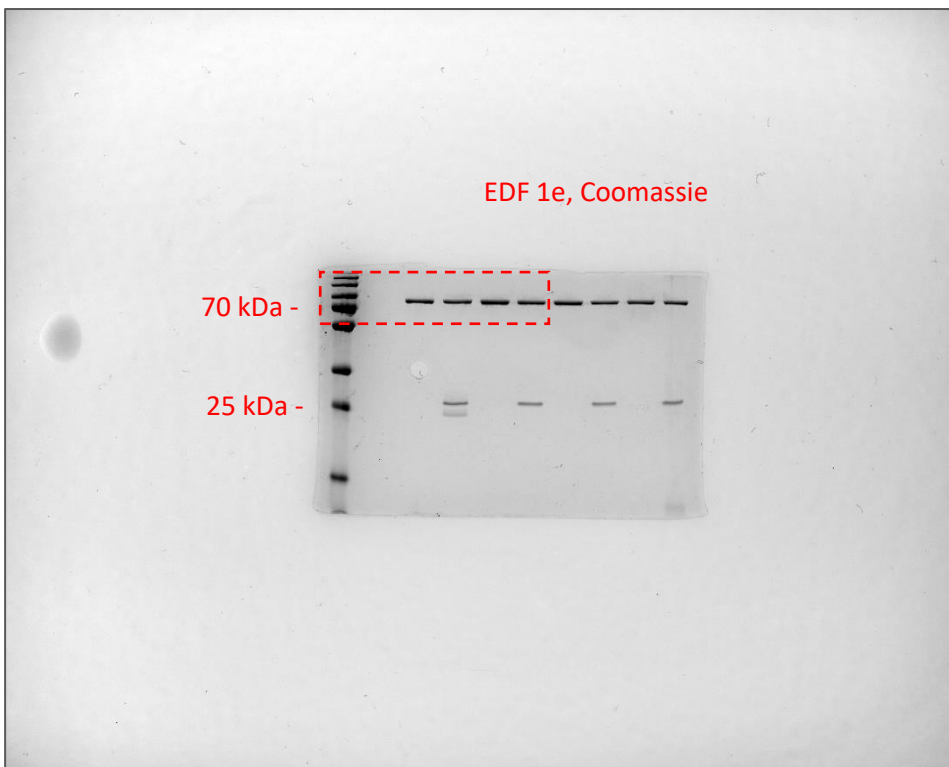

Used in Extended Data Fig. 1e

EDF 2a, Radioactivity

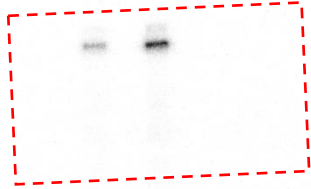

EDF 2a, Coomassie

70 kDa -

25 kDa -

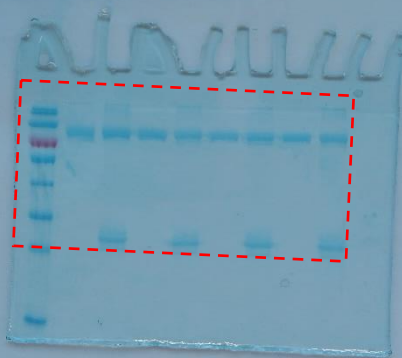

OSMMS with SOS-PAF  
Inhibition of

Used in Extended Data Fig. 2a

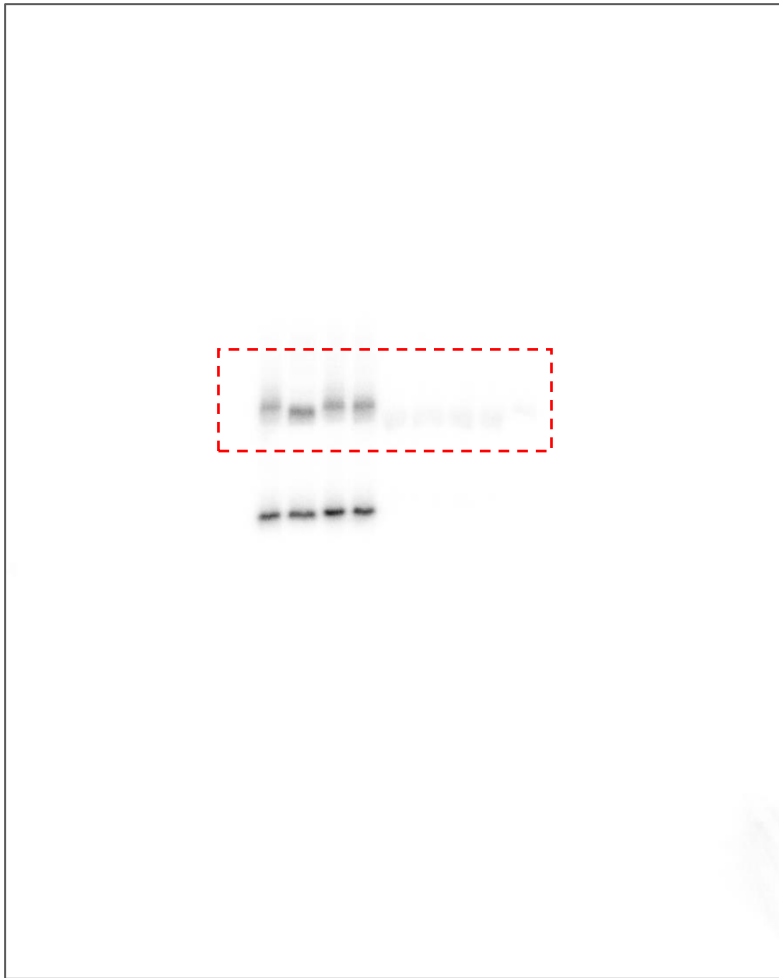

EDF 2b, Radioactivity

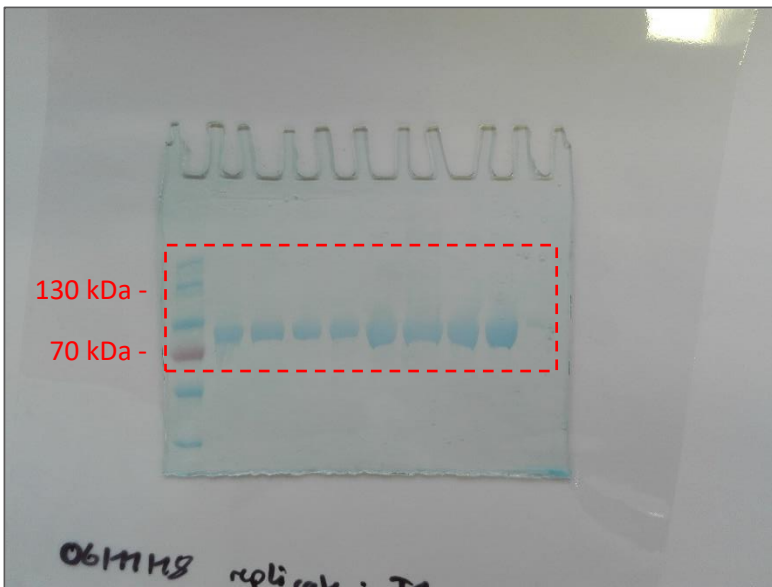

EDF 2b, Coomassie

Used in Extended Data Fig. 2b

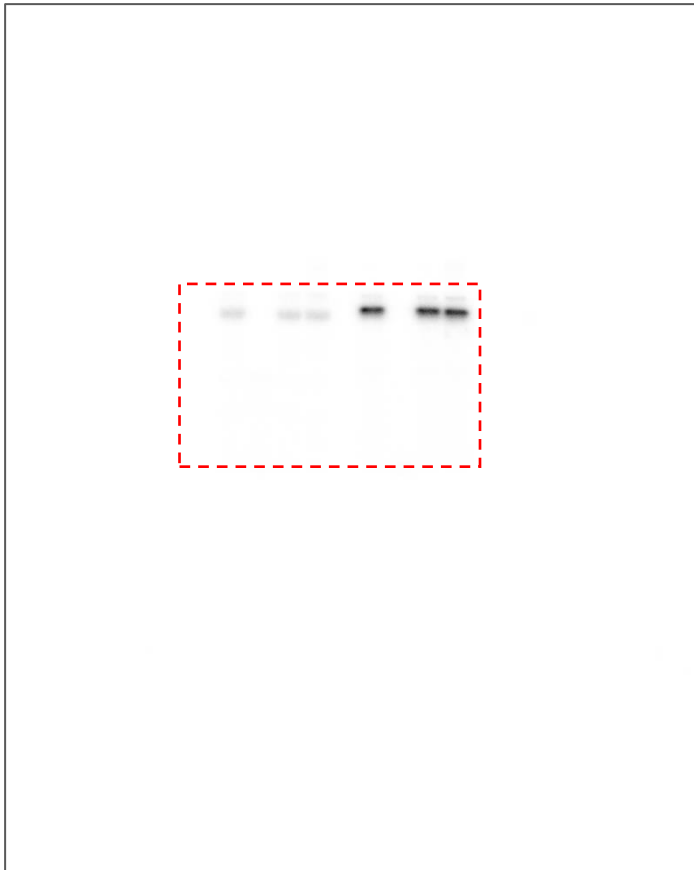

EDF 2c, Radioactivity

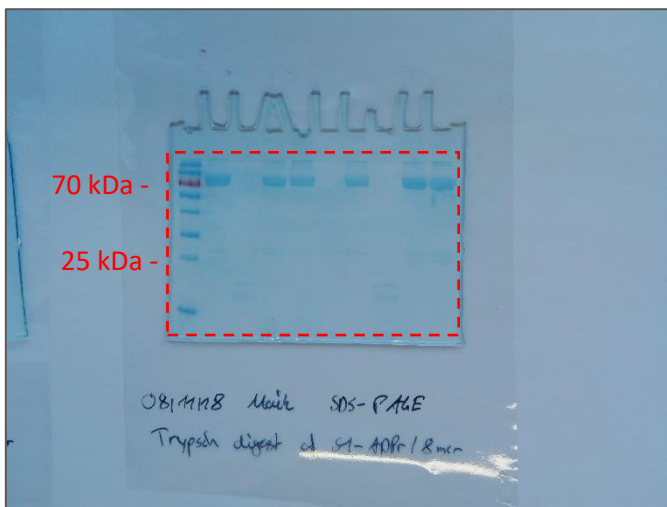

EDF 2c, Coomassie

Used in Extended Data Fig. 2c

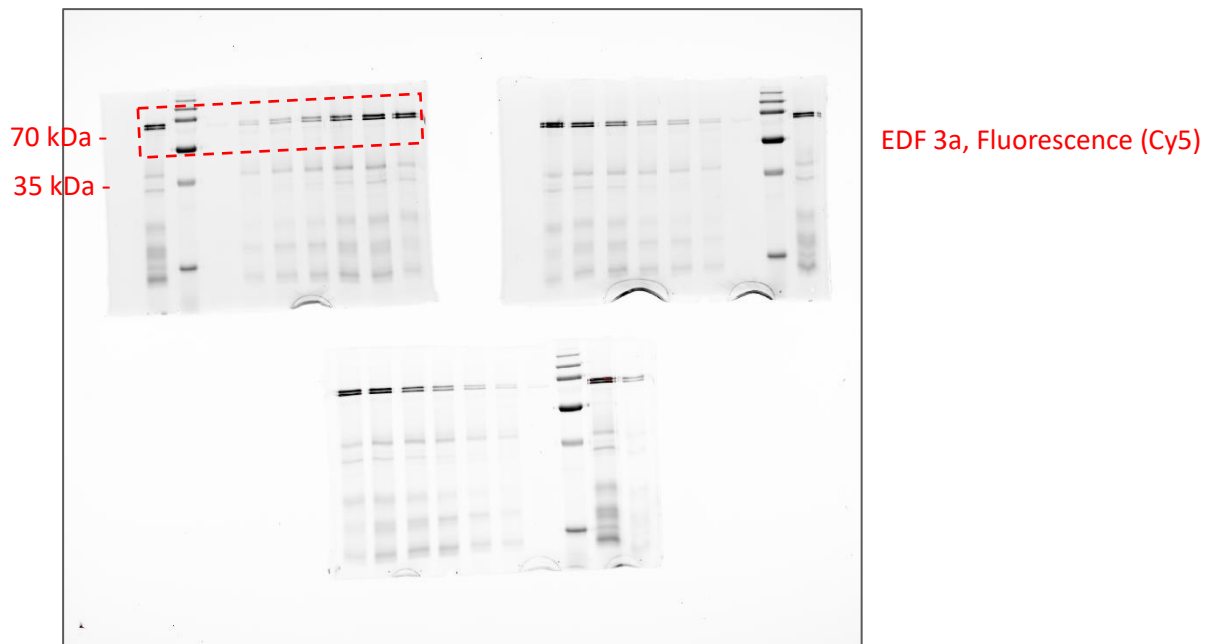

Used in Extended Data Fig. 3a, upper left panel

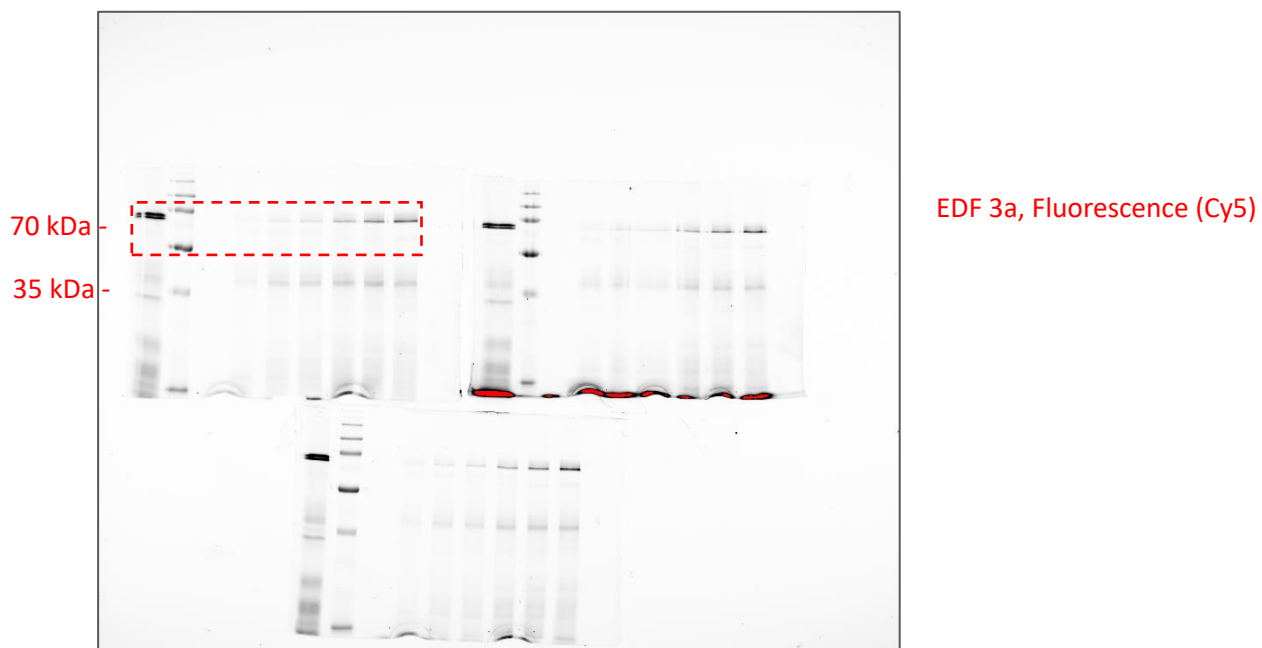

Used in Extended Data Fig. 3a, upper right panel



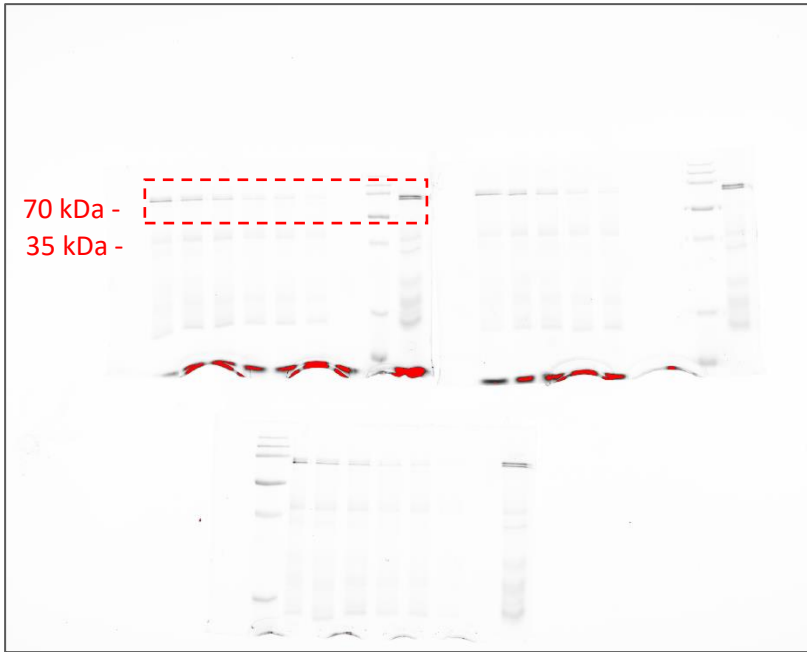

Used in Extended Data Fig. 3a, lower left panel

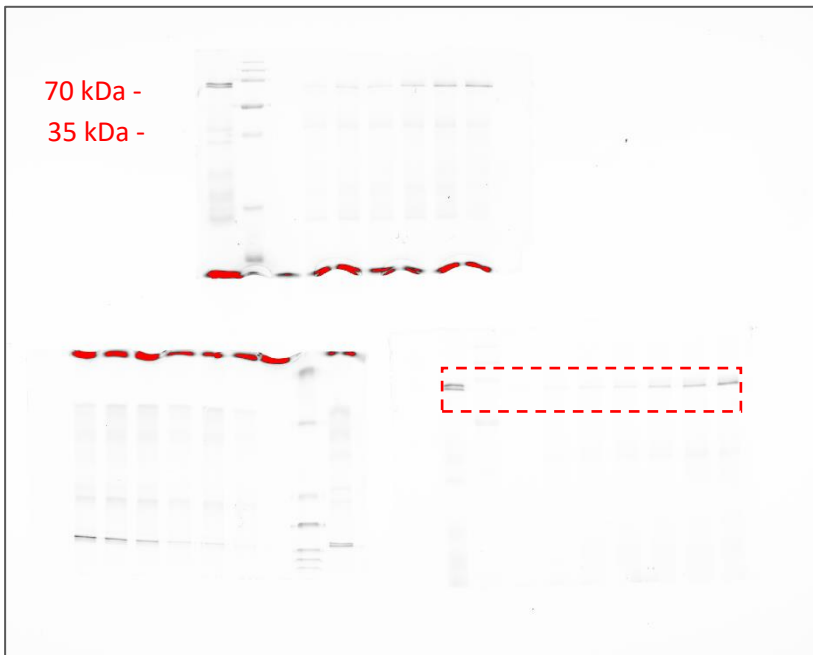

Used in Extended Data Fig. 3a, lower right panel

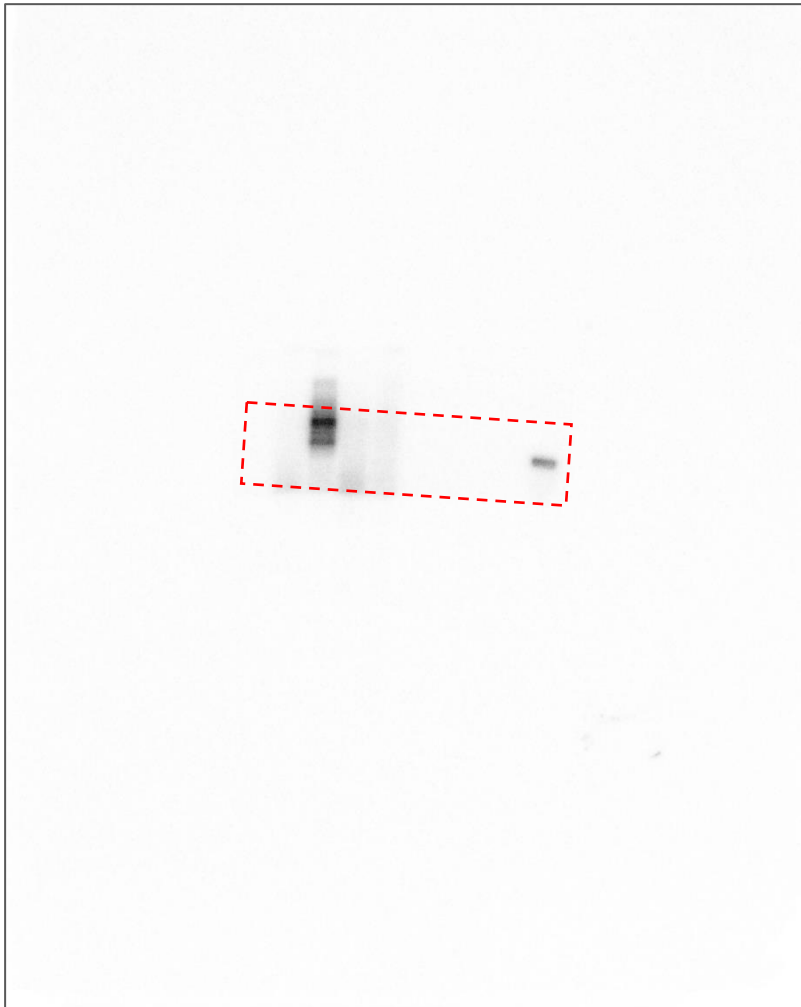

EDF 3b, Radioactivity

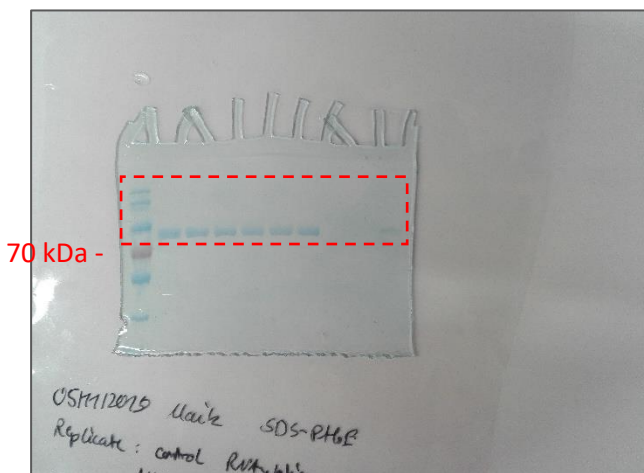

EDF 3b, Coomassie

Used in Extended Data Fig. 3b

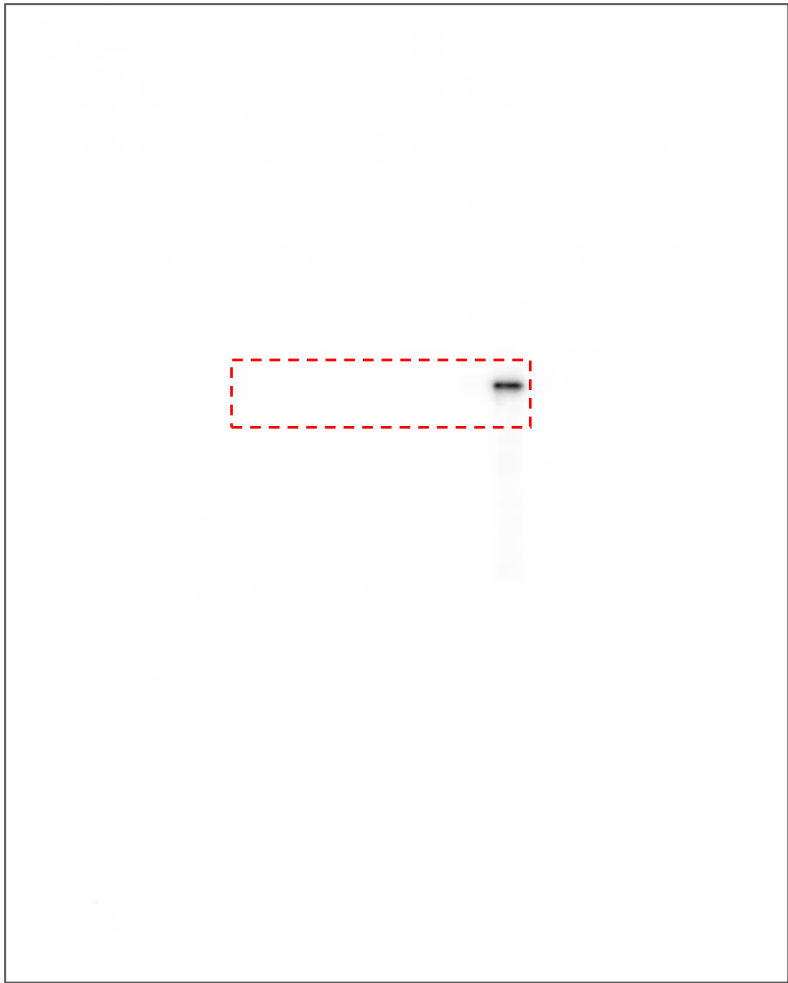

EDF 3c, Radioactivity

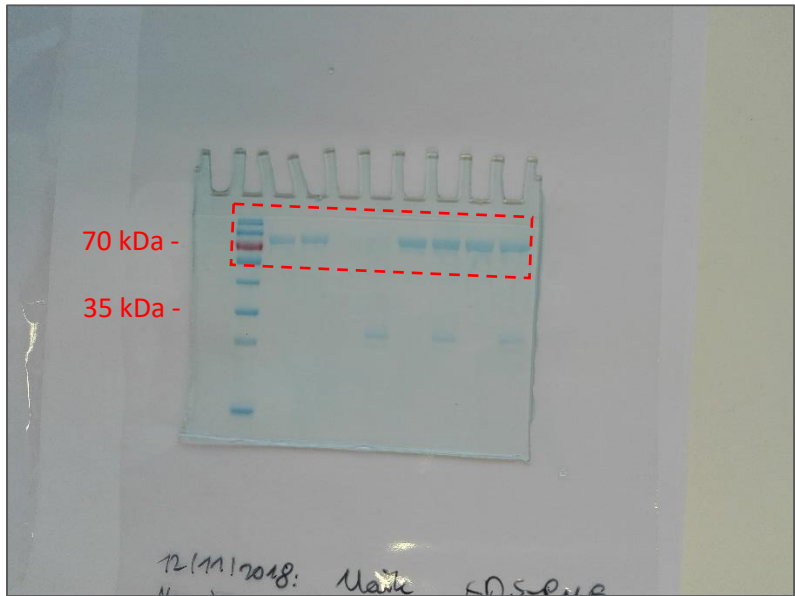

EDF 3c, Coomassie

Used in Extended Data Fig. 3c

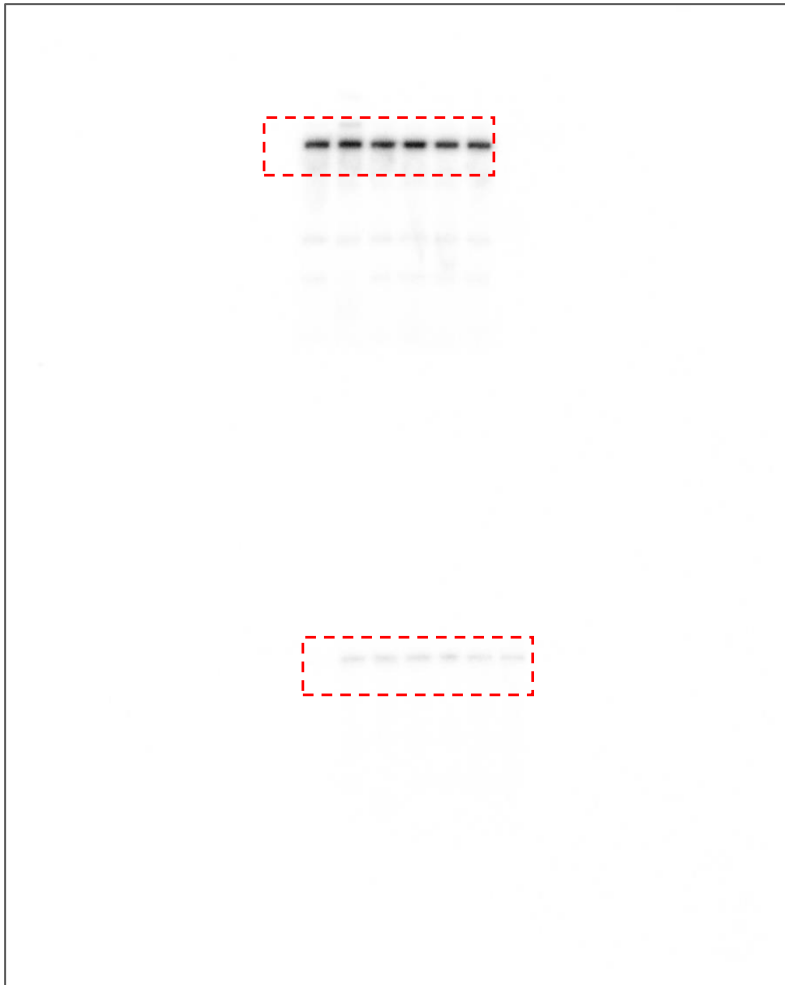

EDF 4a, Radioactivity,  
ADP-ribosylated rS1

EDF 4a, Radioactivity,  
RNAylated rS1

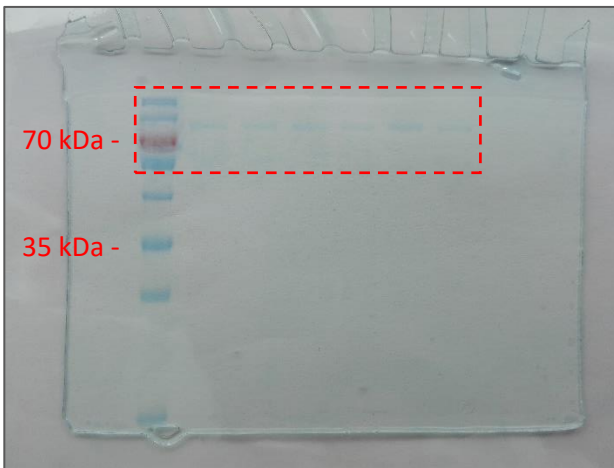

EDF 4a, Coomassie,  
ADP-ribosylated rS1

Used in Extended Data Fig. 4a

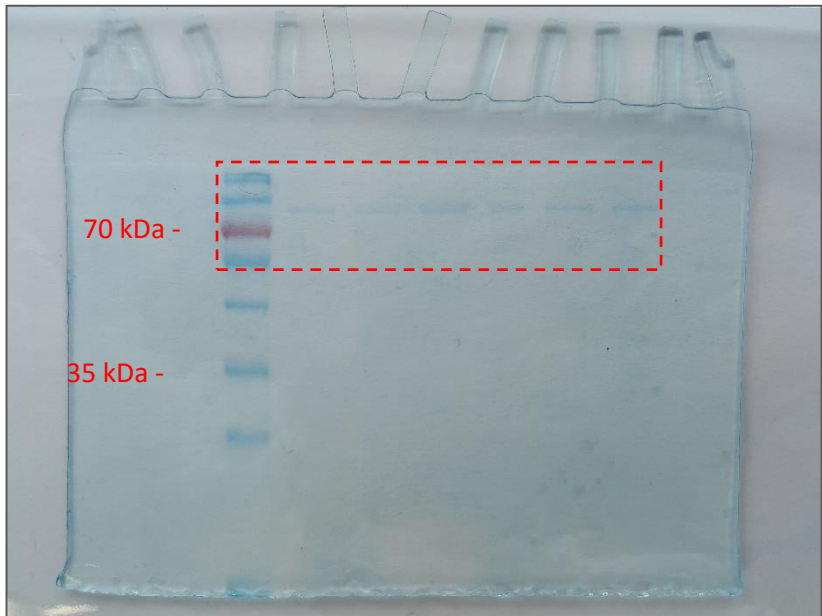

EDF 4a, Coomassie,  
RNAylated rS1

Used in Extended Data Fig. 4a

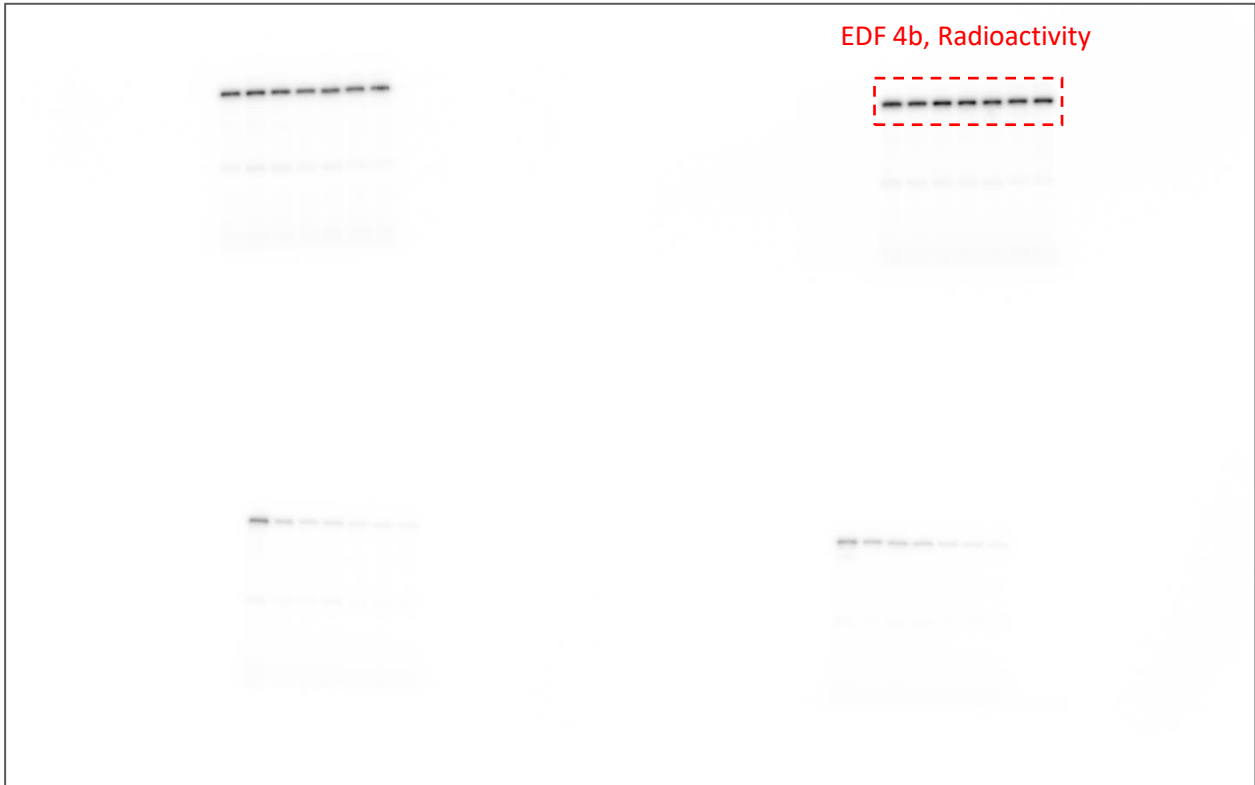

EDF 4b, Radioactivity

Used in Extended Data Fig. 4b

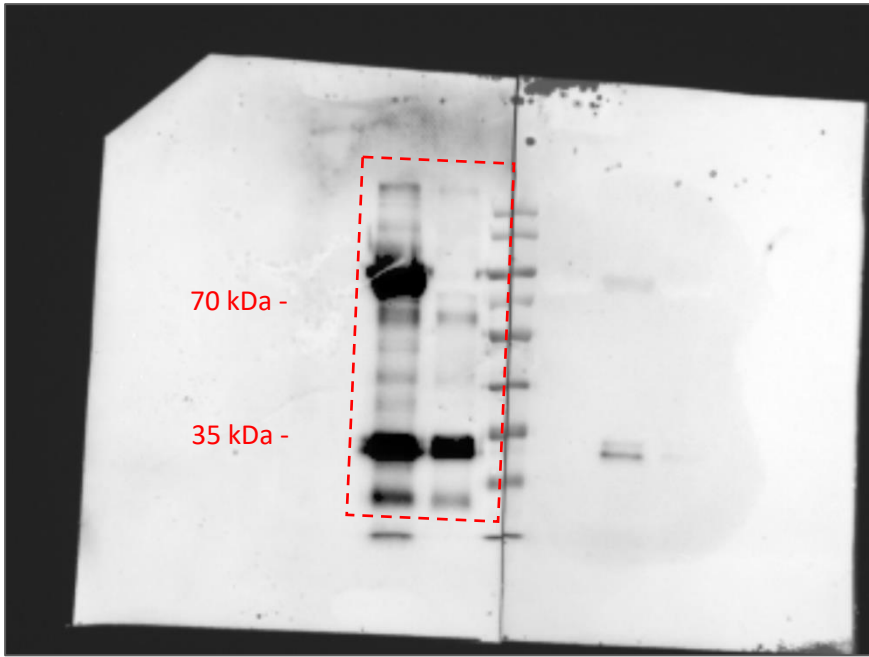

EDF 6a, pan-ADPr merge  
with Colorimetric scan

Used in Extended Data Fig. 6a

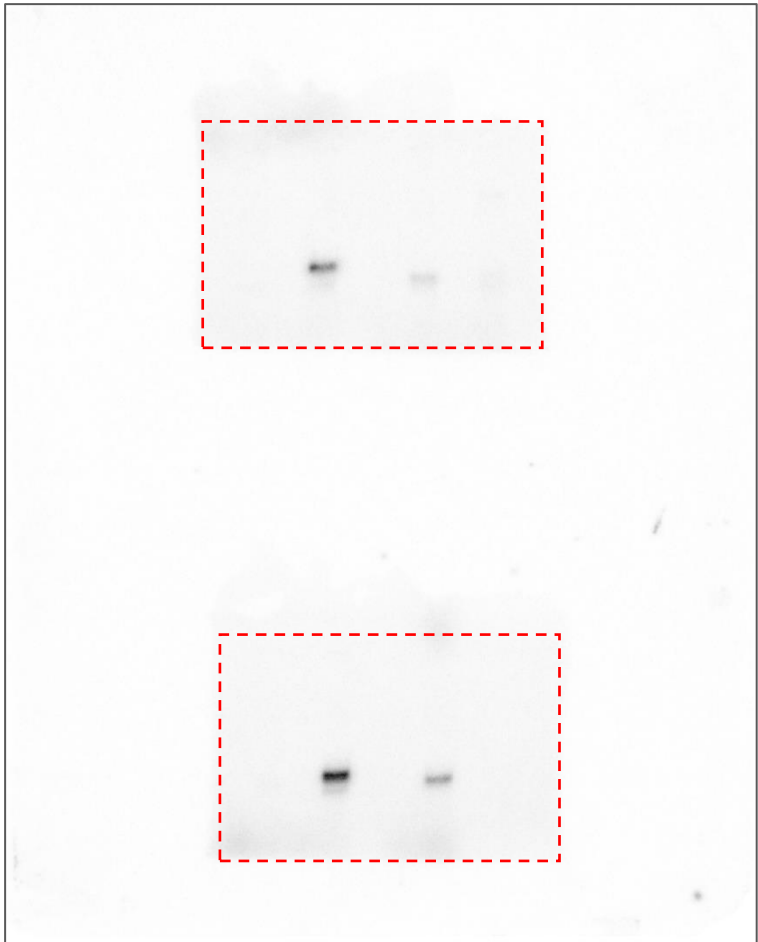

EDF 7b, Radioactivity,  
upper panel

EDF 7b, Radioactivity,  
lower panel

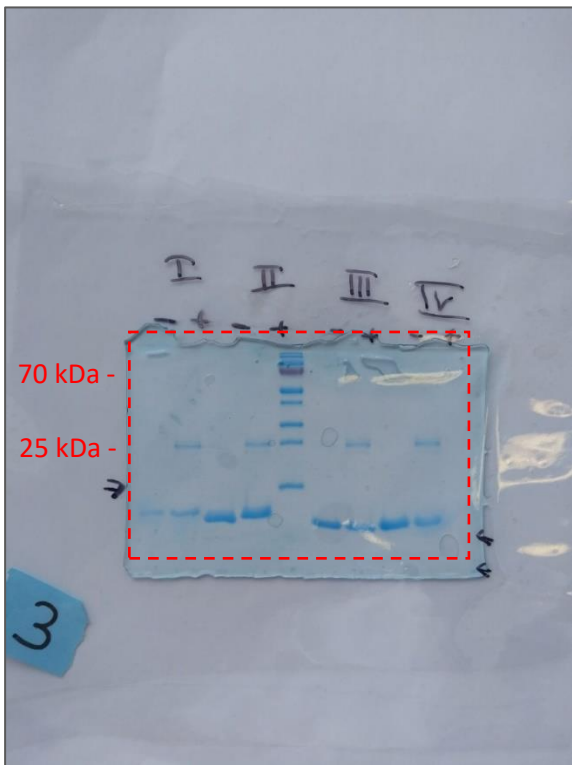

EDF 7b, Coomassie,  
upper panel

Used in Extended Data Fig. 7b

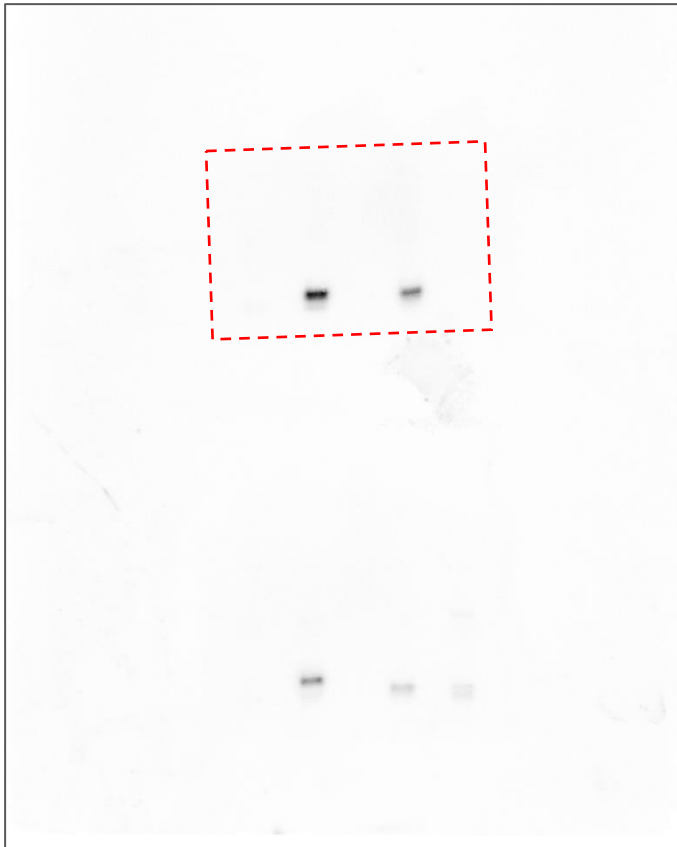

EDF 7b, Radioactivity,  
lower panel

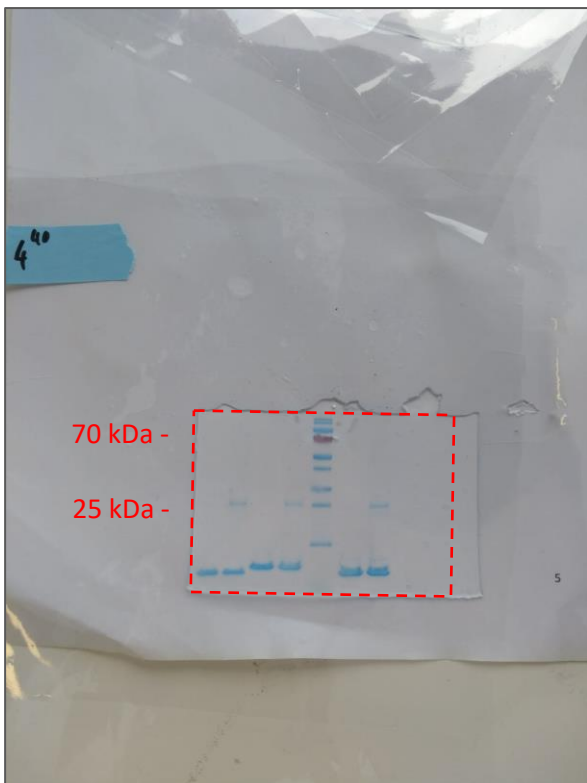

EDF 7b, Coomassie,  
lower panel

Used in Extended Data Fig. 7b



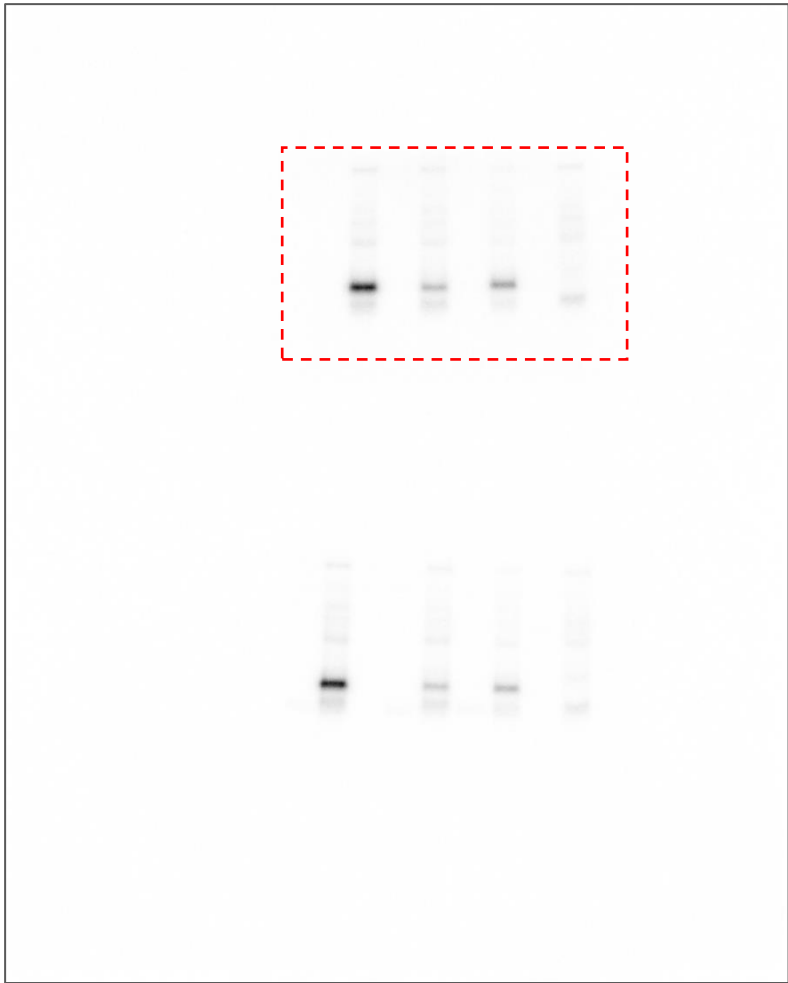

EDF 8a, Radioactivity

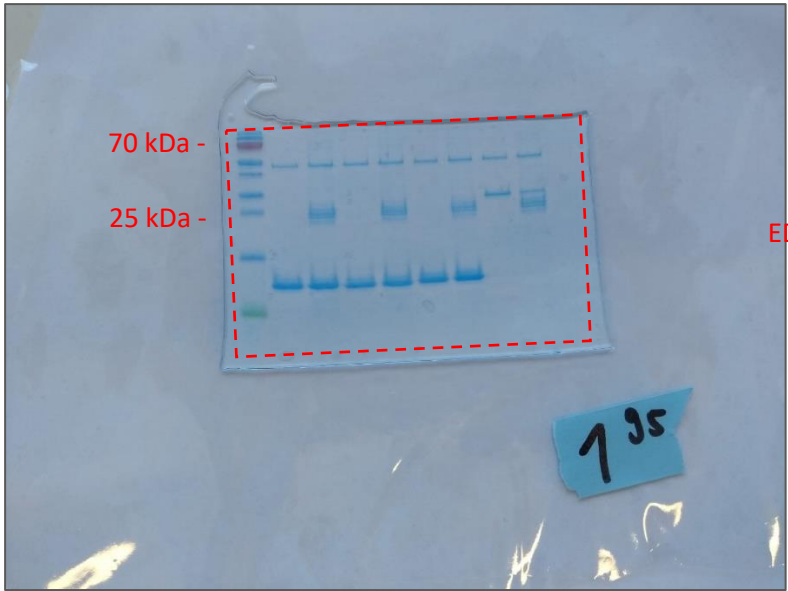

EDF 8a, Coomassie

Used in Extended Data Fig. 8a

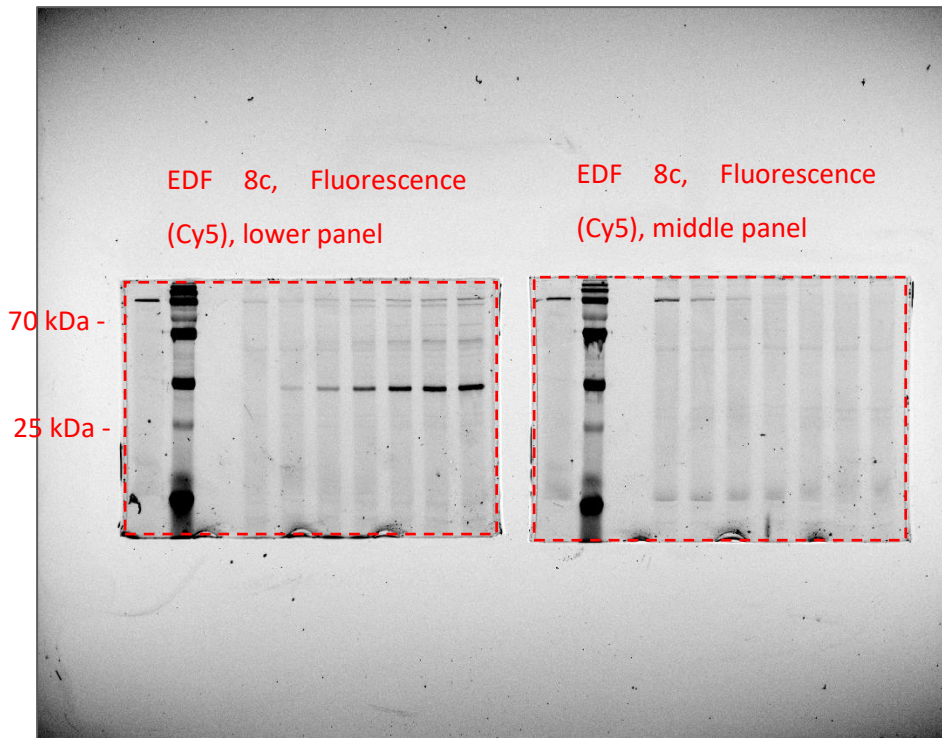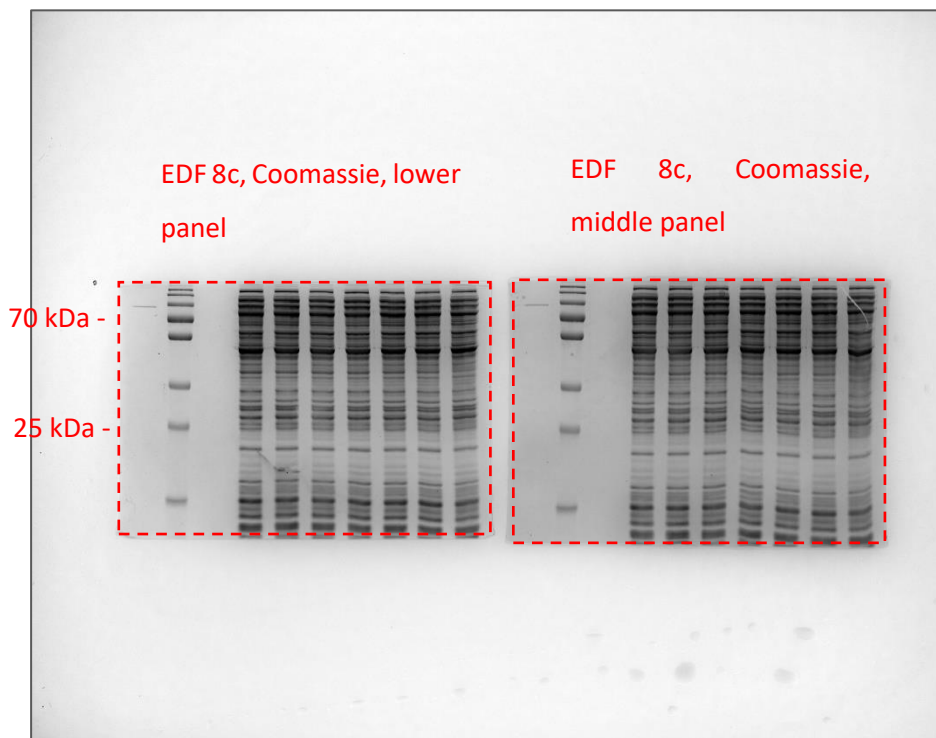

Used in Extended Data Fig. 8c

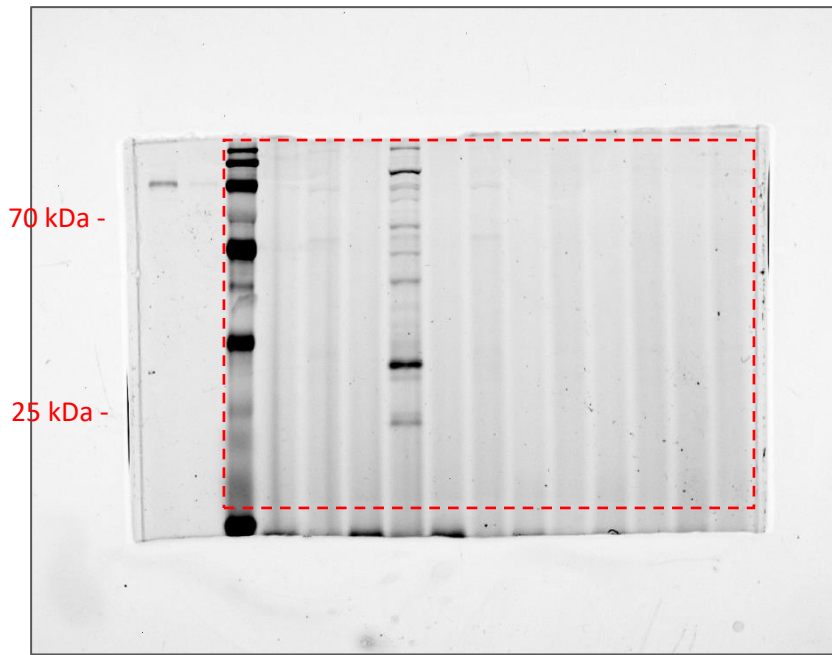

EDF 9a, Fluorescence (Cy5)

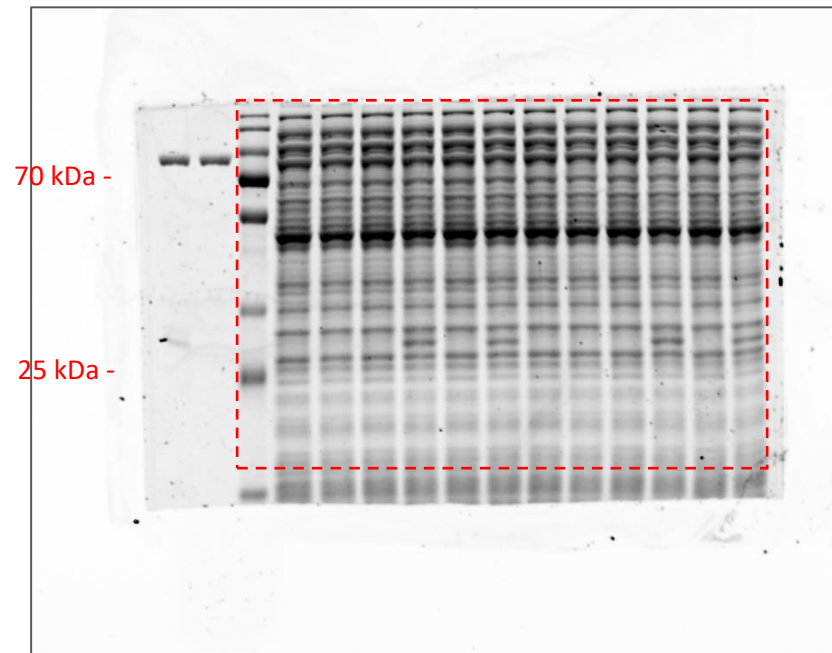

EDF 9a, Coomassie

Used in Extended Data Fig. 9a

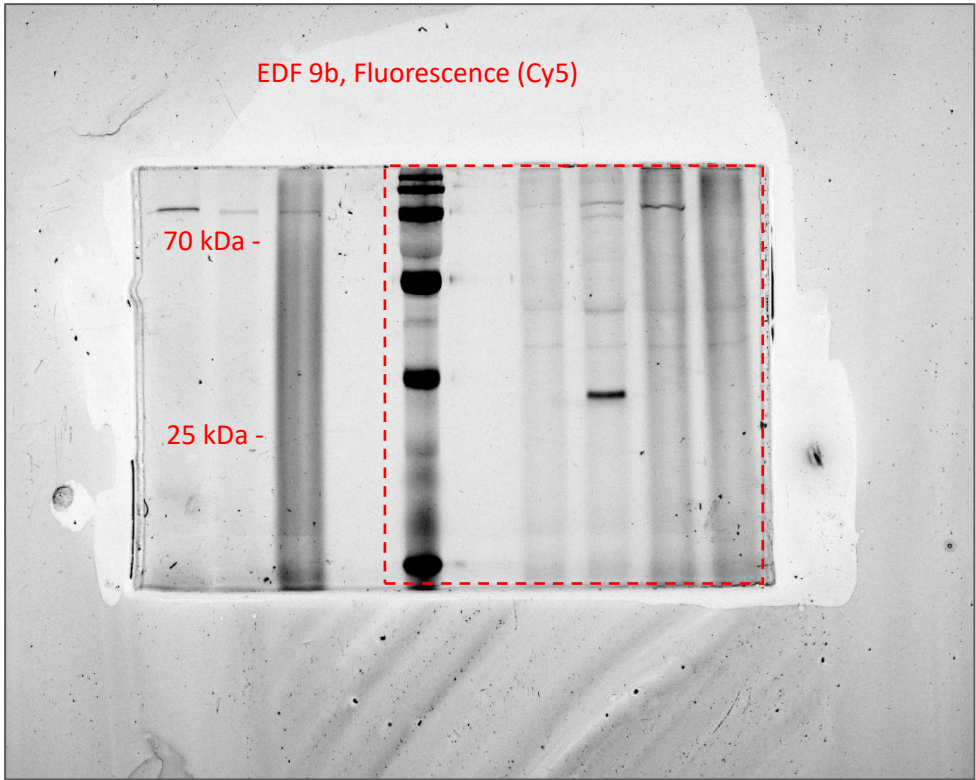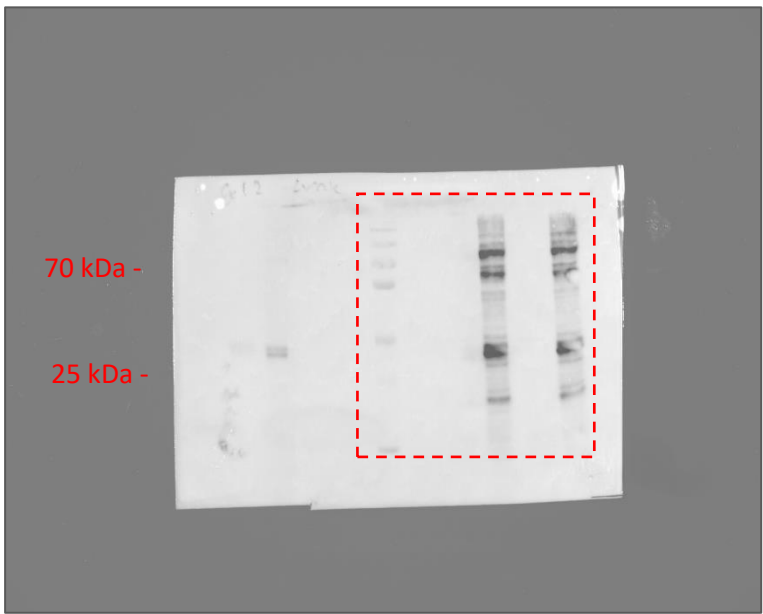

EDF 9b, pan-ADPr Western blot merged with Colorimetric scan

Used in Extended Data Fig. 9b

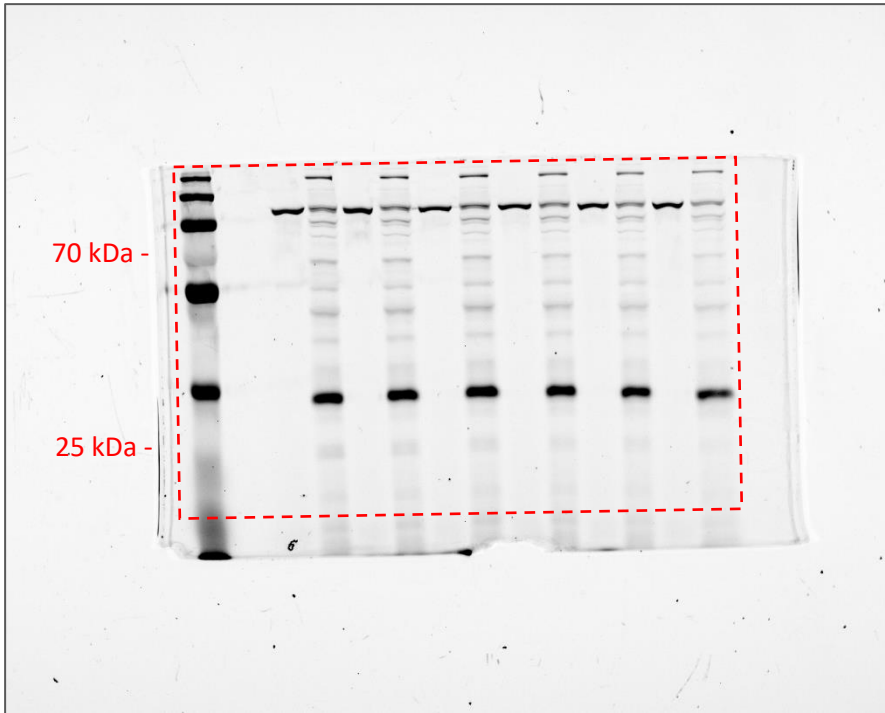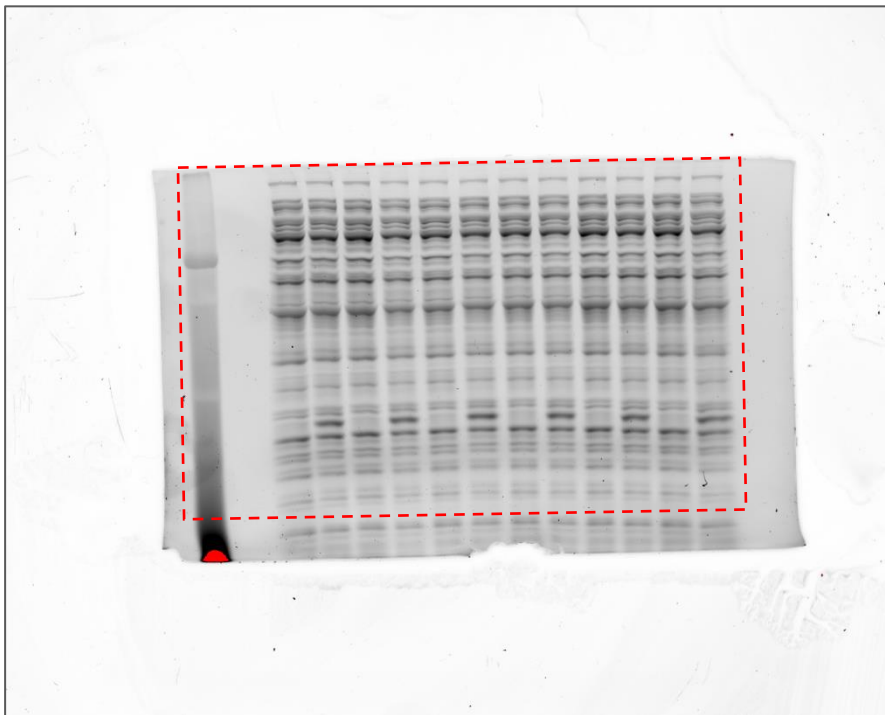

Used in Extended Data Fig. 9c

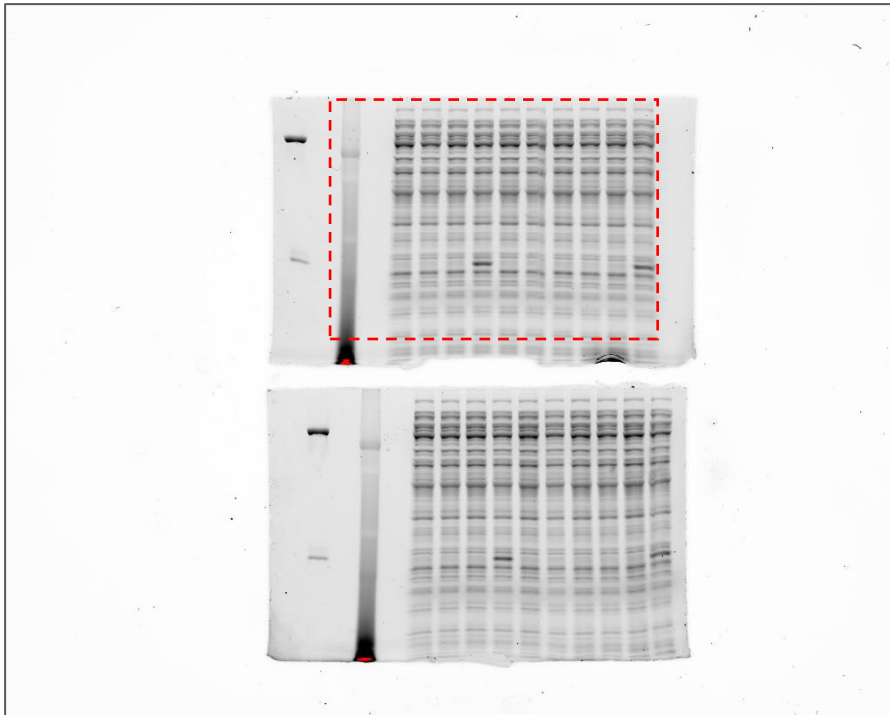

EDF 9d, TCE stain

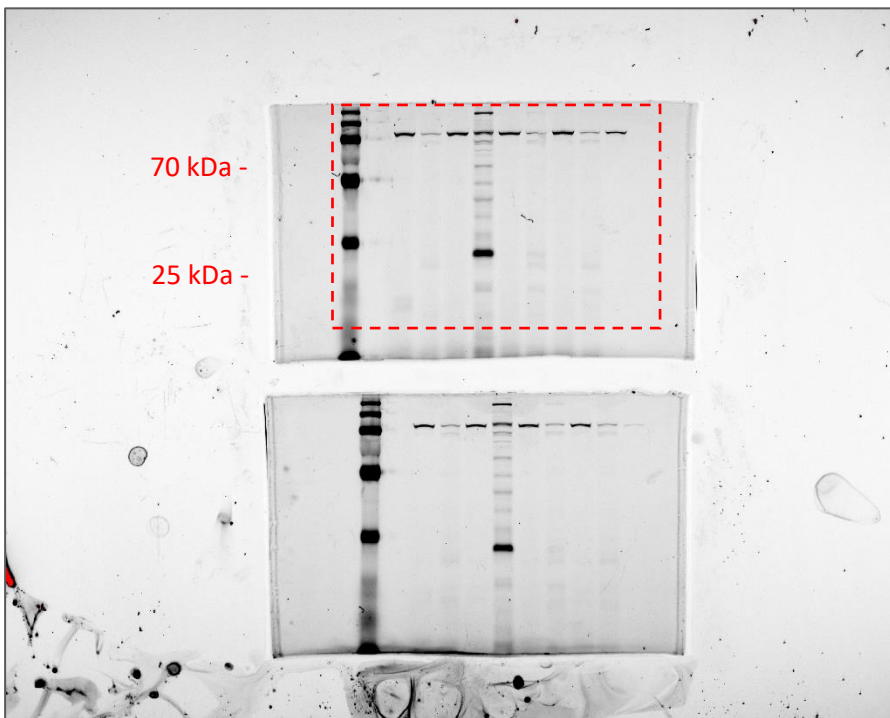

EDF 9d, Fluorescence (Cy5)

Used in Extended Data Fig. 9d

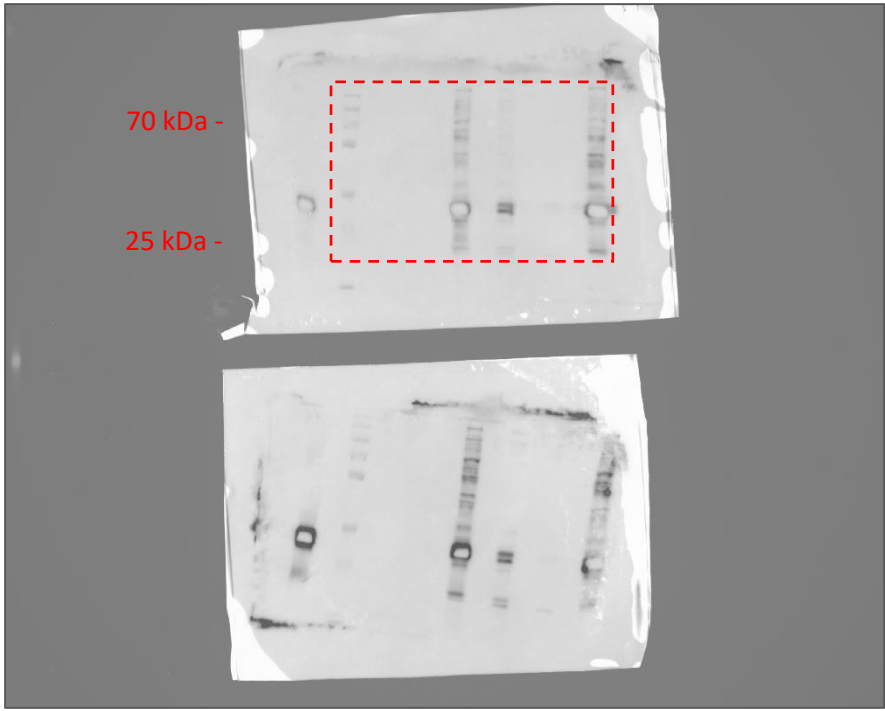

EDF 9d, pan-ADPr Western blot merged with Colorimetric scan

Used in Extended Data Fig. 9d

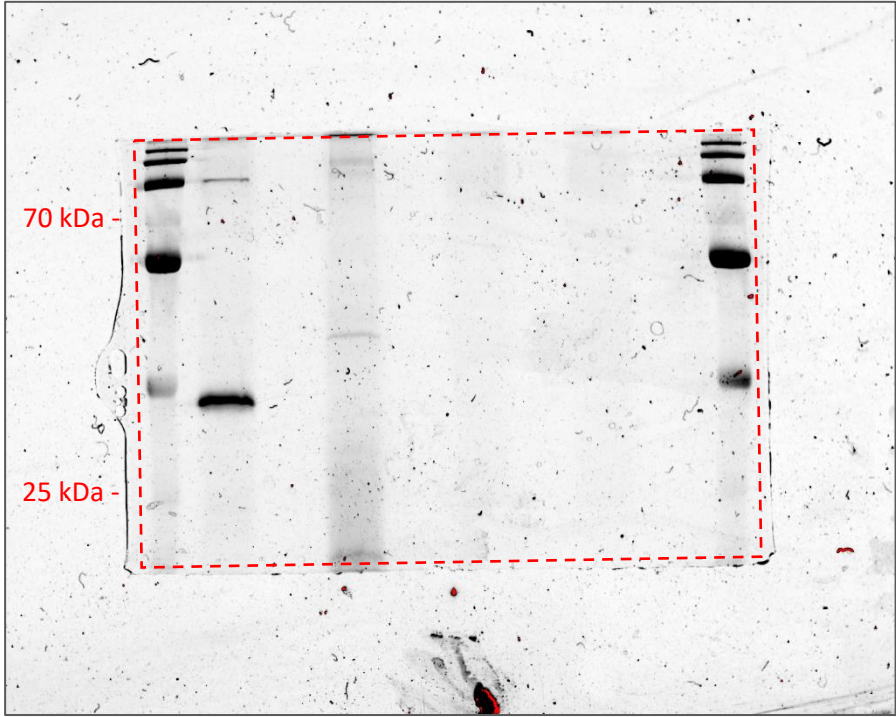

EDF 10a, Fluorescence (Cy5)

Used in Extended Data Fig.10a

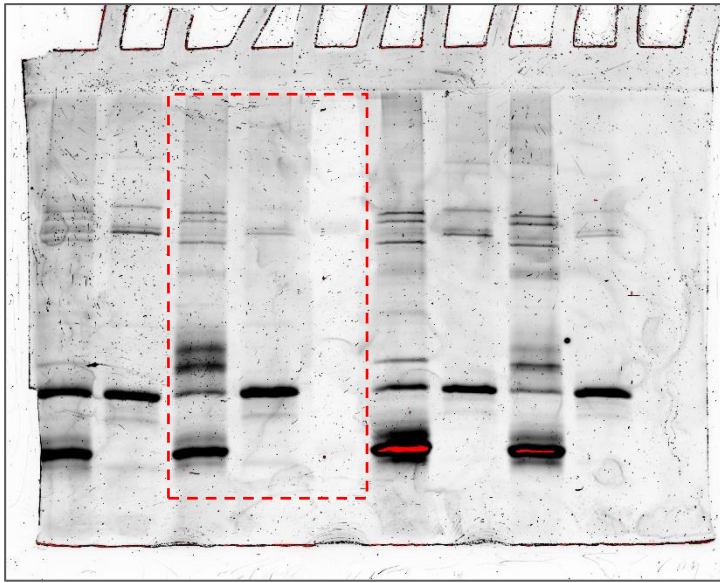

EDF 10c, Flamingo stain

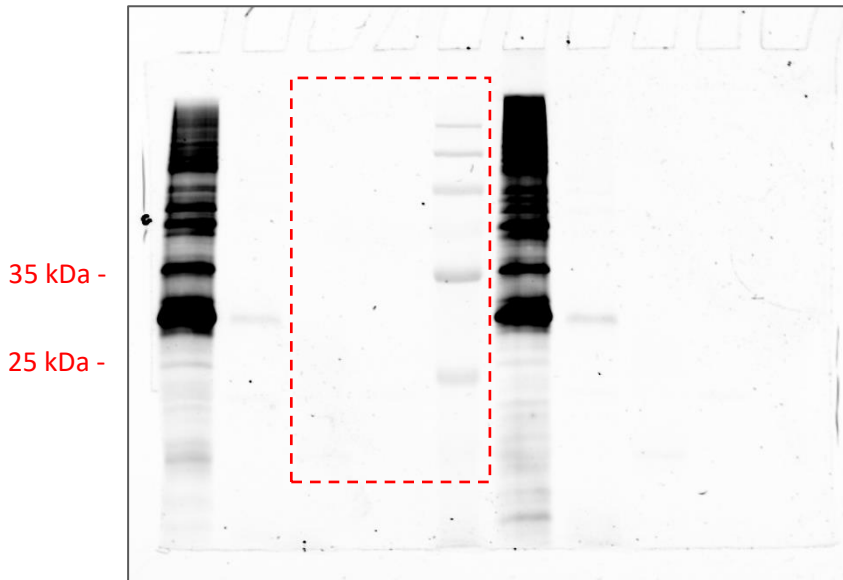

EDF 10c, Coomassie

Used in Extended Data Fig. 10c



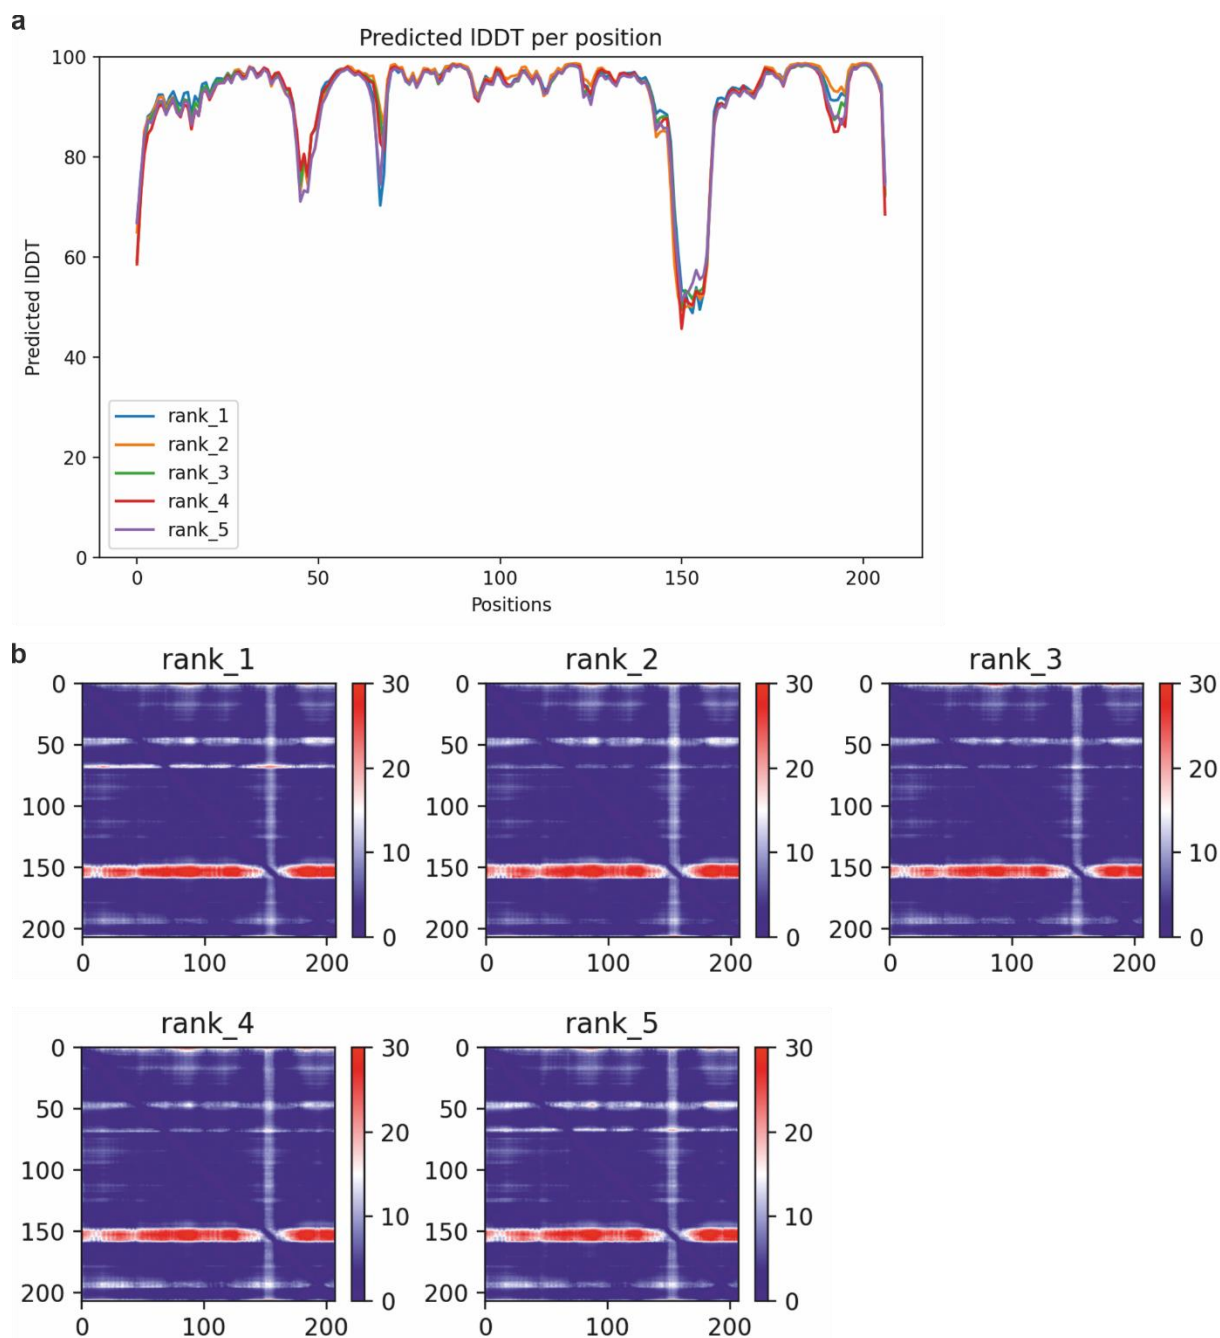

**Supplementary Figure 2: Confidence metrics of the Alphafold prediction model of ModB structure shown in Extended Data Fig. 1f.** Plots of predicted local-distance difference test (pLDDT) (a) and predicted aligned error (PAE) (b) are shown as Alphafold prediction metrics<sup>63</sup>. Confidence metrics for the model used here are represented by “rank\_1”.

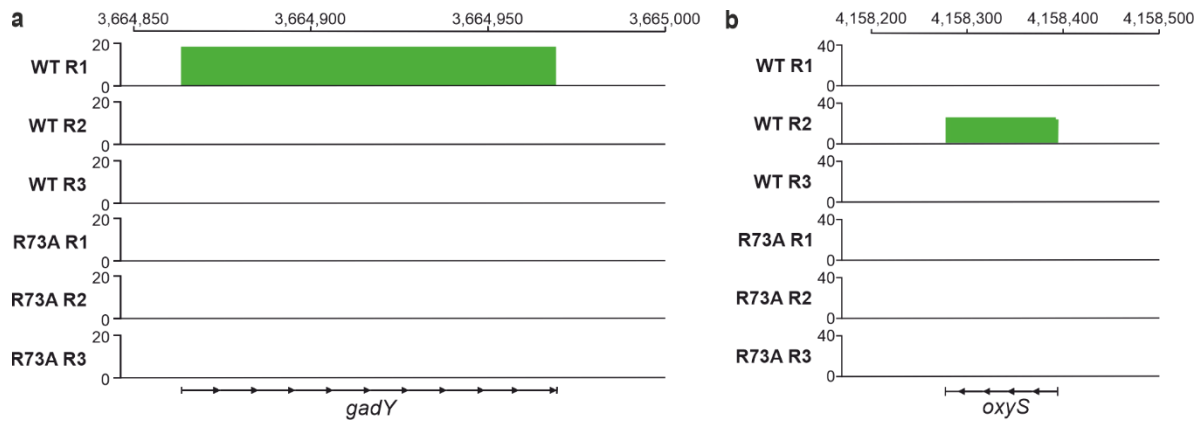

**Supplementary Figure 3: IGV coverage plots for RNAylomeSeq data.** Read coverage on identified RNAylated RNAs as analysed in IGV is exemplarily shown for *gadY* (a) and *oxyS* (b) depicting reads in T4 WT samples (green) vs. T4 ModB R73A, G74A samples (red) for each replicate. RNAylomeSeq merely identifies 5'-termini of mRNAs or, if 200nt or smaller, entire sRNA sequences. This is due to the application of single-end Illumina-Seq which automatically only captures the 5'-end of the respective read/transcript.

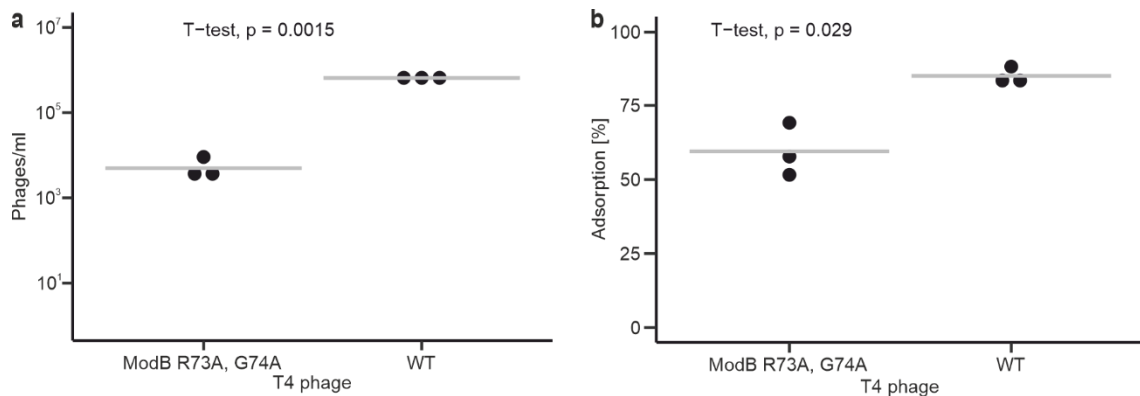

**Supplementary Figure 4: Statistical tests for phenotype of T4 phage ModB R73A, G74A mutant shown in Fig. 5 c-e.** Dotplots are shown for burst size 140 min post-infection (a) and phage adsorption to the host cell 8 min post-infection (b). Grey bars represent mean, black dots individual data points of n=3 biologically independent replicates each. Two-sided t-tests found both differences in burst size (140 min post infection; t-test, two-sided, p-value = 0.0015 at  $p_{\text{signif.}} < 0.05$ ) and phage adsorption between T4 phage WT and T4 phage R73A, G74A (8 min post infection; t-test, two-sided, p-value = 0.029 at  $p_{\text{signif.}} < 0.05$ ) to be statistically significant on a significance level of 0.05. T4 phage ModB R73A, G74A produces less progeny and adsorbs less efficiently to the host cell.

**Supplementary Table 1: MaxQuant Output for LC-MS/MS analysis of endogenously His-tagged rS1 from T4 phage-infected *E. coli* B strain.** Endogenously His-tagged rS1 was isolated from T4 phage-infected (inf) and -uninfected *E. coli* B strain and subjected to LC-MS/MS analysis in biological triplicates (n=3). Intensities from MaxQuant are only shown for rS1 (1A; modificationSpecificPeptides). ADP-ribosylation is detected only for a small subset of rS1 peptides from T4 phage-infected samples whilst absent in uninfected samples. Predominantly, R139/R142 and R485/R487 were identified as ADP-ribosylation sites in all three replicates. ADP-ribosylated peptides are listed by rS1 domain and with the respective arginine residues in 1B; ADPr peptides. Modifications occur at R485/R487 (domain 6) and R139/R142 (domain 2) in all three replicates. Comparing intensities of ADP-ribosylated and unmodified peptides (1C; ADPr vs. unmodified peptides) shows ratios varying from 1.4 % to 6.6 %. Based on this data, one may speculate that R139/R142 and R485/R487 might be major ADP-ribosylation sites on rS1 *in vivo*. MaxQuant parameters for the presented data are presented in 1D; Parameters MaxQuant.

**Supplementary Table 2: MaxQuant Output for LC-MS/MS analysis of His-tagged rS1-WT, -R139A and -R139K mutants from T4 phage-infected *E. coli*.** MaxQuant Output filtered for rS1 protein and sorted according to ADP-ribosylation (ADP-ribosylwoDP) is presented (2A; modificationSpecificPeptides). T4 phage-infected samples (T4 phage) and -uninfected control (LB control) per rS1 version (WT, R139A or R139K mutant) are presented. A total of three biological replicates (n=3) were analysed per rS1 version. Peptides which were found ADP-ribosylated are listed and are assigned to their respective location (rS1 domain) and the modified arginines in the rS1 protein (2B; ADPr peptides). Intensities of ADP-ribosylated peptides are compared to their unmodified counterpart each by dividing the respective intensities (2C; ADPr vs. unmodified peptides). The peptide AFLPGSLVDVR(K/A)PVRDTLHLEGK is found ADP-ribosylated for rS1 WT, rS1 R139A and R139K only in T4 phage-infected samples across all three replicates. It becomes obvious that for the WT peptide high intensities of the ADP-ribosylated peptide relative to the unmodified peptide are detected across all three T4 phage-infected replicates. For the mutant peptides R139A and R139K, these intensities are at least 3-fold lower. Based on this finding, one may speculate that R139 mutation might reduce ADP-ribosylation of the AFLPGSLVDVRPVRDTLHLEGK peptide in rS1. MaxQuant parameters for the presented data are presented in 2D; Parameters MaxQuant.

**Supplementary Table 3: *In vitro* ADP-ribosylation and RNAylation sites in rS1 protein as identified by LC-MS/MS analysis.** Peptide spectrum match (PSM) information for ADP-ribosylated and/or RNAylated rS1 peptides are given in summarised form (pivot) and as complete output from OpenMS tool RNPxl (PSMs). Results were filtered for 1 % FDR on PSM level and q-values (scores) are given. Spectrum IDs, precursor m/z values, charge states, best localisation of modification within the peptide sequence, localisation score and mass errors (in ppm) are provided in "PSMs" sheet.

**Supplementary Table 4: Genes identified to contribute to the RNAylome by RNAylomeSeq.** An excerpt from the counts table is presented. Hits are calculated based on the mean read counts for each gene among T4 WT and R73A, G74A (MUT) samples for each replicate individually. For a hit, the log<sub>2</sub> Fold Change (LFC) between WT and MUT sample is to be greater than 1.5 and the log<sub>2</sub> transformed mean expression greater than -0.5. Hits are indicated as "+" for individual replicates. Read distribution for hits is presented in column "IGV" and the existence of corresponding NAD-capped transcripts is indicated in column "NAD-capped RNA?". Raw read counts are shown in WT\_R1 – MUT\_R3. Some hits are present in all replicates, some in one or two replicates only. Importantly, for the majority of protein\_coding and ncRNA genes, reads initiate with an adenosine or contain an adenosine no more than 2 nt away from the read start. tRNA and rRNA (which more likely represent the background) hits are more abundant in replicates 2 and 3. Especially in replicate 3, the fraction of RNAI reads varies comparing WT and MUT samples, which may explain this variation from the background.

**Supplementary Table 5: MaxQuant Output for LC-MS/MS analysis of *E. coli* cell lysate with addition of ModB to various concentrations.** Samples 1 and 3 represent lysates without ModB, whilst samples 2 and 4 contain 85

nM and 8.5 nM ModB, respectively. The data serve as raw data for values shown in Extended Data Table 3, where log<sub>2</sub> transformed protein intensity values are shown for each sample.

**Supplementary Table 6: *In vitro* ADP-ribosylation and RNAylation sites in rL2 protein as identified by LC-MS/MS analysis.** Peptide spectrum match (PSM) information for ADP-ribosylated and/or RNAylated rL2 peptides are given in summarised form (pivot) and as complete output from OpenMS tool RNPxl (PSMs). Results were filtered for 1 % FDR on PSM level and q-values (scores) are given. Spectrum IDs, precursor m/z values, charge states, best localisation of modification within the peptide sequence, localisation score and mass errors (in ppm) are provided in "PSMs" sheet.

**Supplementary Table 7: RNAs used in this study.**

| <b>RNA</b>                             | <b>RNA sequence</b>                                                                                                  |
|----------------------------------------|----------------------------------------------------------------------------------------------------------------------|
| <b>8mer</b>                            | ACAGUAUU                                                                                                             |
| <b>RNAI</b>                            | ACAGUAUUUGGUAUCUGCGCUCUGCUGAAGCCAGUUACCUUCGGAAAAAGAG<br>UUGGUAGCUCUUGAUCCGGCAAACAAACCACCGCUGGUAGCGGUGGUUUUU<br>UUGUU |
| <b>100nt-RNA (Q<math>\beta</math>)</b> | AUCUUGAUACUACCUUUAGUUCGUUUAAACACGUUCUUGAUAGUAUCUUUU<br>UAUUAACCCAACGCGUAAAGCGUUGAAACUUUGGGUCAAUUUGAUCAUG             |
| <b>10mer-Cy5</b>                       | ACAGUAUUUG                                                                                                           |
| <b>2nt-5'overhang-<br/>Cy5</b>         | ACAGACUUCGGUCU-Cy5                                                                                                   |
| <b>3'overhang-Cy5</b>                  | AGACUUCGGUCUA-Cy5                                                                                                    |
| <b>5'P-blunt-Cy5</b>                   | AGACUUCGGUCU-Cy5                                                                                                     |
| <b>linear-Cy5</b>                      | AGACUUCGAC-Cy5                                                                                                       |
| <b>40mer-Cy5</b>                       | ACAGUAUUUGGUAUCUGCGCUCUGCUGAAGCCAGUUACUU-Cy5                                                                         |

**Supplementary Table 8: Genomic DNA sequence of ARTs, rS1 variants and ADP-ribose hydrolases.**  
 Start codon in italic; thrombin cleavage site in bold; mutations in red and bold; restriction sites underlined.

| Gene [5', 3' restriction site]         | DNA sequence                                                                                                                                                                                                                                                                                                                                                                                                                                                                                                                                                                                                                                                                                                                                                                                                                                                                                                                                                                                                                                                                                                                                                                                                                                                                                                                                                                                                                                                                                                                                                                                                                                                                                                                                                                                                                                                                                                                                                                                                                                                                                                                                                                                                                                                                                                                                                                                                                                                                                                                                                                                                                                                                       |
|----------------------------------------|------------------------------------------------------------------------------------------------------------------------------------------------------------------------------------------------------------------------------------------------------------------------------------------------------------------------------------------------------------------------------------------------------------------------------------------------------------------------------------------------------------------------------------------------------------------------------------------------------------------------------------------------------------------------------------------------------------------------------------------------------------------------------------------------------------------------------------------------------------------------------------------------------------------------------------------------------------------------------------------------------------------------------------------------------------------------------------------------------------------------------------------------------------------------------------------------------------------------------------------------------------------------------------------------------------------------------------------------------------------------------------------------------------------------------------------------------------------------------------------------------------------------------------------------------------------------------------------------------------------------------------------------------------------------------------------------------------------------------------------------------------------------------------------------------------------------------------------------------------------------------------------------------------------------------------------------------------------------------------------------------------------------------------------------------------------------------------------------------------------------------------------------------------------------------------------------------------------------------------------------------------------------------------------------------------------------------------------------------------------------------------------------------------------------------------------------------------------------------------------------------------------------------------------------------------------------------------------------------------------------------------------------------------------------------------|
| <b>Alt [<i>NcoI</i>, <i>XhoI</i>]</b>  | <p><u>CCATGGG</u>GAGAACTTATTACAGAATTATTTGACGAAGATACTACTCTTCCAATTACAACTTAT<br/>           ATCCAAAGAAGAAAATACCGCAAATTTTTTCAGTTCATGTTGATGATGCAATTGAACAACCAG<br/>           GCTTTCGTTTATGTACCTATACATCTGGAGGTGATACTAATCGTGATTTAAAGATGGGCGATA<br/>           AAATGATGCATATTGTTCTTTTACATTAAGTCTAAAGGTTCAATTGCTAAATTAAGGTTCT<br/>           TGGTCCAAGCCCAATTAATTATATCAATTCAGTTTTACTGTTGCAATGCAACAATGCGCCA<br/>           GTATAAAATTGATGCCTGTATGCTCCGTATTCTTAAGTCTAAAAGTCTGGCCAAGCTCGACA<br/>           AATTCAAGTTATTGCTGATAGACTTATCCGTAGTCGTTCAAGTGGTAGATACGTCCTTCTTAA<br/>           GGAAGTCTGGGATTACGATAAAAAGTATGCATATATTCTTATACATCGCAAAAATGTACT<br/>           AGAAGACATTCCAGGAGTCCGGAAATAGTACCGAGCTCTTACTAAAGTTGAATCGAAGG<br/>           TCGGTGATGTTTATCAATAAAGATACTGGGGCTCAAGTAACTAAAATGAGGCAATTGCA<br/>           GCATCTATTGCGCAAGAAAATGATAAACGTTCTGACCAAGCTGTAATCGTTAAAGTTAAAAT<br/>           TCCCGTAGAGCAATTGCGCAAAGTCAGTCATTGGAATCTTCTAGATTTGAAACACCAATGTTT<br/>           CAAAATTTGAGGCTTCAGCGGCCGAATTAATAAACAGCGGACGCGCCTTAAATTTCTGAT<br/>           TCTAATGAATTAACGGTAATTTCTACTTCAGGATTTGCACTAGAGAATGCTCTTAGCAGTGTT<br/>           ACAGCTGGGATGGCATTGAGAGAAGCTTCTATAATTCCTGAAGATAAAGAATCCATTATTAAC<br/>           GCAGAAATAAAAAATAAAGCTTTAGAAAGATTACGAAAAGAATCTATTACTTCAATAAAAAAC<br/>           CTTAGAAACTATTGCTTCTATCGTCGATGATACTTTAGAAAAATATAAGGGTGCTTGGTTTGA<br/>           AAGAAATATTAACAAACATTCGCATTTAAACCAAGATGCTGCAAATGAGTTAGTACAAAATTC<br/>           TTGGAATGCAATAAAAAACAAAGATTATTCGAAGAGAATTACGTGGATATGCTCTTACCGCTG<br/>           GATGGTCATTACATCCTATAGTCGAAAATAAAGATTCATCTAAATACACACCAGCGCAAAAAC<br/>           GCGGAATTCGTGAATACGTAGGTTCAAGGATATGTAGACATAAATAATGCTCTTTTGGGATTAT<br/>           ATAATCCAGATGAGCGTACAAGTATTTTACAGCATCTGACATAGAAAAAGCTATTGATAATT<br/>           TAGATTCAGCCTTTAAAATGGTGAACGATTACCAAAAGGTATTACTTTGTATCGTTACAAC<br/>           GAATGTTACCTTCAATATACGAAGCAATGGTAAAAATCGAGTTTTTTATTTAGAAACTTTGT<br/>           GTCAACATCATTATATCCAAATATTTTTGGTACTTGGATGACTGATTCATCTATAGGTGTTTTA<br/>           CCAGACGAAAAGCGTTTAAAGCGTTTCTATTGATAAACTGATGAAGGACTTGTAATTCTAGC<br/>           GATAATTTAGTTGGAATTGGATGGGTTTACTTGGGGCTGATAAGGTCAATGTTGTTTTACCC<br/>           GGTGGAAGTTTAGCGCCTTCAAATGAAATGGAAGTCATTTTGCCACGTGGATTAATGGTCAA<br/>           AGTTAATAAAATAACCGATGCATCTTACAATGATGGAACAGTTAAAATAACAACAAGCTTAT<br/>           TCAAGCTGAAGTTATGACCACAGAAGAAGTCAACCGAATCGGTAATCTATGACGGAGACCATT<br/>           TAATGGAACTGGTGAATTGGTTACAATGACAGGTGATATAGAAGATAGAGTTGACTTTGCA<br/>           TCATTTGTTTCATCAAATGTTAAACAGAAAAGTAGAATCATCTCTTGGAAATTATTGCGTCTTGCA<br/>           TAGATATTGCAAACATGCCTTACAAGTTCGTTCAAGGACTGGTGGCGCGCGGAGCCTCGAG</p> |
| <b>ModA [<i>NcoI</i>, <i>XhoI</i>]</b> | <p><u>CCATGGG</u>GAAAATACTCAGTAATGCACTAAAAGATTTTAAAATAAAATCAATGGATGCATCG<br/>           GTGCGTGCTTCTATTCGTGAAGAATACTTTCTGAAGGGTTAATTTATCTGAAATTGAACTTT<br/>           TAATTCATTGTATTACTAATAAACAGATGACCATTCTGGTTAAATGAAATAATCAAATCTCG<br/>           TTTGGTTCCAAACGATAAACCTCTTTGGAGAGGTGTTCCAGCTGAGACTAAACAAGTATAAA<br/>           TCAAGGAATTGATATTATTACATTTGATAAAGTCGTATCAGCTTCATATGATAAAAAATATAGC</p>                                                                                                                                                                                                                                                                                                                                                                                                                                                                                                                                                                                                                                                                                                                                                                                                                                                                                                                                                                                                                                                                                                                                                                                                                                                                                                                                                                                                                                                                                                                                                                                                                                                                                                                                                                                                                                                                                                                                                                                                                                                                                                                                                                                                                                                                             |

|                                            |                                                                                                                                                                                                                                                                                                                                                                                                                                                                                                                                                                                                                                                                                                                                                                                                                                                                                                                                                                                                                                                                                                                                                                      |
|--------------------------------------------|----------------------------------------------------------------------------------------------------------------------------------------------------------------------------------------------------------------------------------------------------------------------------------------------------------------------------------------------------------------------------------------------------------------------------------------------------------------------------------------------------------------------------------------------------------------------------------------------------------------------------------------------------------------------------------------------------------------------------------------------------------------------------------------------------------------------------------------------------------------------------------------------------------------------------------------------------------------------------------------------------------------------------------------------------------------------------------------------------------------------------------------------------------------------|
|                                            | TCTACATTTTGCTTCTGGTTAGAGTATAACACACAAGTTATTTTTGAATTCAAAGCTCCTATG<br>GTATTC AATTTCCAGGAGTATGCTATAAAAAGCTCTACGCTGTAAAGAATACAATCCAACTTT<br>AAGTTTCCGGATAGTCATCGTTATCGTAATATGGAATTAGTTTCAGATGAACAAGAAGTAATG<br>ATACCAGCTGGAAGTGTATTTAGAATTGCAGATAGATATGAGTATAAAAAGTGTTC AACATA<br>CACTATCTATACTCTTGATTTTGAAGGATTAATCTACTGGTGCCGCGGGCAGCCTCGAG                                                                                                                                                                                                                                                                                                                                                                                                                                                                                                                                                                                                                                                                                                                                                                                                                             |
| <b>ModB [NcoI,<br/>XhoI]</b>               | <u>CCATGGGA</u> ATTATTAATCTTGCAGATGTTGAACAGTTATCTATAAAAAGCTGAAAGCGTTGATT<br>TTCAATATGATATGTATAAAAAGGTCTGTGAAAAATTTACTGACTTTGAGCAGTCTGTTCTTTG<br>GCAATGTATGGAAGCCAAAAAGAATGAAGCTCTTCATAAGCATTAAATGAAATCATTAAAA<br>AGCATTAACTAAATCGCCTTATCAATTATATCGTGGTATATCAAATCGACAAAAGA ACTCA<br>TAAAGATTTACAAGTTGGAGAAGTGTTC AACGAACAGGGTAGATTCA TTTACTACTAGTT<br>TGCATACAGCGTGTCTTTTTCTATGCTGAATATTTCACTGAAACAATACTTCGTTTAAAAAC<br>TGATAAAGCTTTTAAATTATTCTGACCATATCAGCGATATTATACTTTCTTCTCCTAATACTGAGT<br>TTAAGTACACGTATGAAGATACTGATGGATTAGATT CAGAGCGTACTGATAACTTAATGATG<br>ATTGTGCGTGAACAAGAATGGATGATTCCAATTGAAAGTATAAAAATACTTCTATTTCAAAA<br>GAAAAATTACACGATTCATTTGGAACATTTAAAGTTTATGATATTGAGGTAGTTGAACTGGTG<br><b>CCGCGCGGCAGCCTCGAG</b>                                                                                                                                                                                                                                                                                                                                                                                                                                       |
| <b>ModB R73A,<br/>G74A<br/>[NcoI/XhoI]</b> | <u>CCATGGGA</u> ATTATTAATCTTGCAGATGTTGAACAGTTATCTATAAAAAGCTGAAAGCGTTGATT<br>TTCAATATGATATGTATAAAAAGGTCTGTGAAAAATTTACTGACTTTGAGCAGTCTGTTCTTTG<br>GCAATGTATGGAAGCCAAAAAGAATGAAGCTCTTCATAAGCATTAAATGAAATCATTAAAA<br>AGCATTAACTAAATCGCCTTATCAATTATAT <b>GCGGCA</b> ATATCAAATCGACAAAAGA ACTCA<br>TAAAGATTTACAAGTTGGAGAAGTGTTC AACGAACAGGGTAGATTCA TTTACTACTAGTT<br>TGCATACAGCGTGTCTTTTTCTATGCTGAATATTTCACTGAAACAATACTTCGTTTAAAAAC<br>TGATAAAGCTTTTAAATTATTCTGACCATATCAGCGATATTATACTTTCTTCTCCTAATACTGAGT<br>TTAAGTACACGTATGAAGATACTGATGGATTAGATT CAGAGCGTACTGATAACTTAATGATG<br>ATTGTGCGTGAACAAGAATGGATGATTCCAATTGAAAGTATAAAAATACTTCTATTTCAAAA<br>GAAAAATTACACGATTCATTTGGAACATTTAAAGTTTATGATATTGAGGTAGTTGAACTGGTG<br><b>CCGCGCGGCAGCCTCGAG</b> ACCACCACCACCACCCTGA                                                                                                                                                                                                                                                                                                                                                                                                          |
| <b>pET28-rS1<br/>[NcoI, XhoI]</b>          | <u>CCATGGGA</u> ACTGAATCTTTGCGGCATGCTCAACTCTTTGAAGAGTCCTTAAAAGAAATCGAA<br>ACCCGCCCGGGTTCTATCGTTCTGCGGTTGTTGTTGCTATCGACAAAGACGTAGTACTGGTT<br>GACGCTGGTCTGAAATCTGAGTCCGCCATCCCGGCTGAGCAGTTCAAAAACGCCAGGGCGA<br>GCTGGAATCCAGGTAGGTGACGAAGTTGACGTTGCTCTGGACGCAGTAGAAGACGGCTTC<br>GGTGA AACTCTGCTGTCCCGTGAGAAAGCTAAACGTCACGAAGCCTGGATCACGCTGAAAA<br>AGCTTACGAAGATGCTGAAACTGTTACCGGTGTTATCAACGGCAAAGTTAAGGGCGGCTTCA<br>CTGTTGAGCTGAACGGTATTCTGTCGTTCCCTGCCAGTTCTCTGGTAGACGTTCTGTCGGTGC<br>GTGACACTCTGCACCTGGAAGGCAAAGAGCTTGAATTTAAAGTAATCAAGCTGGATCAGAAG<br>CGCAACAACGTTGTTGTTTCTCGTCGTGCCGTTATCGAATCCGAAAACAGCGCAGAGCGCGA<br>TCAGCTGCTGGA AACCTGCAGGAAGGCATGGAAGTTAAAGGTATCGTTAAGAACCTCACTG<br>ACTACGGTGCATTCTGTTGATCTGGGCGGCGTTGACGGCCTGCTGCACATCACTGACATGGCC<br>TGGA AACCGGTTAAGCATCCGAGCGAAATCGTCAACGTGGGCGACGAAATCACTGTTAAAGT<br>GCTGAAGTTCGACCGCAACGTACCCGTGTATCCCTGGGCCTGAAACAGCTGGGCGAAGATC<br>CGTGGGTAGCTATCGCTAAACGTTATCCGGAAGGTACCAAACGACTGGTTCGCGTGACCAAC<br>CTGACCGACTACGGCTGCTTCGTTGAAATCGAAGAAGGCGTTGAAGGCCTGGTACACGTTTC<br>CGAAATGGACTGGACCAACAAAACATCCACCCGTCCAAAGTTGTTAACGTTGGCGATGTAG<br>TGGAAGTTATGGTTCTGGATATCGACGAAGAACGTCGTCGTATCTCCCTGGGTCTGAAACAG |

|                                                      |                                                                                                                                                                                                                                                                                                                                                                                                                                                                                                                                                                                                                                                                                                                                                                                                                                                                                                                                                                                                                                                                                                                                                                                                                                                                                                                                                                                                                                                                                                                                                                                                                                                                                                                                                                                                                                                                                                                                                      |
|------------------------------------------------------|------------------------------------------------------------------------------------------------------------------------------------------------------------------------------------------------------------------------------------------------------------------------------------------------------------------------------------------------------------------------------------------------------------------------------------------------------------------------------------------------------------------------------------------------------------------------------------------------------------------------------------------------------------------------------------------------------------------------------------------------------------------------------------------------------------------------------------------------------------------------------------------------------------------------------------------------------------------------------------------------------------------------------------------------------------------------------------------------------------------------------------------------------------------------------------------------------------------------------------------------------------------------------------------------------------------------------------------------------------------------------------------------------------------------------------------------------------------------------------------------------------------------------------------------------------------------------------------------------------------------------------------------------------------------------------------------------------------------------------------------------------------------------------------------------------------------------------------------------------------------------------------------------------------------------------------------------|
|                                                      | <p>TGCAAAGCTAACCCGTGGCAGCAGTTCGCGGAAACCCACAACAAGGGCGACCGTGTTGAAG<br/> GTAATAATCAAGTCTATCACTGACTTCGGTATCTTCATCGGCTTGGACGGCGGCATCGACGGCC<br/> TGGTTCACCTGTCTGACATCTCCTGGAACGTTGCAGGCGAAGAAGCAGTTCGTGAATACAAA<br/> AAAGGGCGACGAAATCGCTGCAGTTGTTCTGCAGGTTGACGCAGAACGTGAACGTATCTCCCT<br/> GGGCGTTAAACAGCTCGCAGAAGATCCGTTCAACAACCTGGGTTGCTCTGAACAAGAAAGGC<br/> GCTATCGTAACCGGTAAAGTAACTGCAGTTGACGCTAAAGGGCGCAACCGTAGAACTGGCTGA<br/> CGGCGTTGAAGGTTACCTGCGTGCTTCTGAAGCATCCCCTGACCGCGTTGAAGACGCTACCC<br/> TGGTCTGAGCGTTGGCGACGAAGTTGAAGCTAAATTCACCGCGTGGATCGTAAAAACCGC<br/> GCAATCAGCCTGTCTGTTCTGCGGAAAGACGAAGCTGACGAGAAAGATGCAATCGCAACTGT<br/> TAACAAACAGGAAGATGCAAACCTCTCCAACAACGCAATGGCTGAAGCTTCAAAGCAGCTA<br/> AAGGGCAGCTGGTGCCGCGCGGCAGCCTCGAG</p>                                                                                                                                                                                                                                                                                                                                                                                                                                                                                                                                                                                                                                                                                                                                                                                                                                                                                                                                                                                                                                                                                                                                                                                                      |
| <p><b>pET28-rS1<br/> R139A [NcoI,<br/> XhoI]</b></p> | <p><u>CCATGGG</u>AACTGAATCTTTGCGGCATGCTCAACTCTTTGAAGAGTCCTTAAAAGAAATCGAA<br/> ACCCGCCCGGGTTCTATCGTTCGTGGCGTTGTTGTTGCTATCGACAAAGACGTAGTACTGGTT<br/> GACGCTGGTCTGAAATCTGAGTCCGCCATCCCGGCTGAGCAGTTCAAAAACGCCAGGGCGA<br/> GCTGGAATCCAGGTAGGTGACGAAGTTGACGTTGCTCTGGACGCAGTAGAAGACGGCTTC<br/> GGTGAACCTCTGCTGTCCCCTGAGAAAGCTAAACGTACGAAGCCTGGATCACGCTGGAAAA<br/> AGCTTACGAAGATGCTGAAACTGTTACCGGTGTTATCAACGGCAAAGTTAAGGGCGGCTTCA<br/> CTGTTGAGCTGAACGGTATTCGTGCGTTCCTGCCAGGTTCTCTGGTAGACGTTGCCCGGTGC<br/> GTGACACTCTGCACCTGGAAGGCAAAGAGCTTGAATTTAAAGTAATCAAGCTGGATCAGAAG<br/> CGCAACAACGTTGTTGTTTCTCGTCGTGCCGTTATCGAATCCGAAAACAGCGCAGAGCGCGA<br/> TCAGCTGCTGGAACCTGCAGGAAGGCATGGAAGTTAAAGGTATCGTTAAGAACCTCACTG<br/> ACTACGGTGCATTGTTGATCTGGGCGGCGTTGACGGCCTGCTGCACATCACTGACATGGCC<br/> TGGAACCGCTTAAGCATCCGAGCGAAATCGTCAACGTGGGCGACGAAATCACTGTTAAAGT<br/> GCTGAAGTTCGACCGCGAACGTACCCGTGTATCCCTGGGCCTGAAACAGCTGGGCGAAGATC<br/> CGTGGGTAGCTATCGCTAAACGTTATCCGGAAGGTACCAAACCTGACTGGTTCGCGTGACCAAC<br/> CTGACCGACTACGGCTGCTTCGTTGAAATCGAAGAAGGCGTTGAAGGCCTGGTACACGTTTC<br/> CGAAATGGACTGGACCAACAAAACATCCACCCGTCCAAAGTTGTTAACGTTGGCGATGTAG<br/> TGGAAGTTATGGTTCTGGATATCGACGAAGAACGTGCTCGTATCTCCCTGGGTCTGAAACAG<br/> TGCAAAGCTAACCCGTGGCAGCAGTTCGCGGAAACCCACAACAAGGGCGACCGTGTTGAAG<br/> GTAATAATCAAGTCTATCACTGACTTCGGTATCTTCATCGGCTTGGACGGCGGCATCGACGGCC<br/> TGGTTCACCTGTCTGACATCTCCTGGAACGTTGCAGGCGAAGAAGCAGTTCGTGAATACAAA<br/> AAAGGGCGACGAAATCGCTGCAGTTGTTCTGCAGGTTGACGCAGAACGTGAACGTATCTCCCT<br/> GGGCGTTAAACAGCTCGCAGAAGATCCGTTCAACAACCTGGGTTGCTCTGAACAAGAAAGGC<br/> GCTATCGTAACCGGTAAAGTAACTGCAGTTGACGCTAAAGGGCGCAACCGTAGAACTGGCTGA<br/> CGGCGTTGAAGGTTACCTGCGTGCTTCTGAAGCATCCCCTGACCGCGTTGAAGACGCTACCC<br/> TGGTCTGAGCGTTGGCGACGAAGTTGAAGCTAAATTCACCGCGTGGATCGTAAAAACCGC<br/> GCAATCAGCCTGTCTGTTCTGCGGAAAGACGAAGCTGACGAGAAAGATGCAATCGCAACTGT<br/> TAACAAACAGGAAGATGCAAACCTCTCCAACAACGCAATGGCTGAAGCTTCAAAGCAGCTA<br/> AAGGGCAGCTGGTGCCGCGCGGCAGCCTCGAG</p> |
| <p><b>pET28-rS1<br/> R139K [NcoI,<br/> XhoI]</b></p> | <p><u>CCATGGG</u>AACTGAATCTTTGCGGCATGCTCAACTCTTTGAAGAGTCCTTAAAAGAAATCGAA<br/> ACCCGCCCGGGTTCTATCGTTCGTGGCGTTGTTGTTGCTATCGACAAAGACGTAGTACTGGTT<br/> GACGCTGGTCTGAAATCTGAGTCCGCCATCCCGGCTGAGCAGTTCAAAAACGCCAGGGCGA<br/> GCTGGAATCCAGGTAGGTGACGAAGTTGACGTTGCTCTGGACGCAGTAGAAGACGGCTTC<br/> GGTGAACCTCTGCTGTCCCCTGAGAAAGCTAAACGTACGAAGCCTGGATCACGCTGGAAAA</p>                                                                                                                                                                                                                                                                                                                                                                                                                                                                                                                                                                                                                                                                                                                                                                                                                                                                                                                                                                                                                                                                                                                                                                                                                                                                                                                                                                                                                                                                                                                                                                                            |



|                                                 |                                                                                                                                                                                                                                                                                                                                                                                                                                                                                                                                                                                                                                                                                                                                                                                                                                                                                                                                                                                                                                                                                                                                                                                                                                                                                                                                                                                                                                                                                                                                                                                                                                                                                                                                                            |
|-------------------------------------------------|------------------------------------------------------------------------------------------------------------------------------------------------------------------------------------------------------------------------------------------------------------------------------------------------------------------------------------------------------------------------------------------------------------------------------------------------------------------------------------------------------------------------------------------------------------------------------------------------------------------------------------------------------------------------------------------------------------------------------------------------------------------------------------------------------------------------------------------------------------------------------------------------------------------------------------------------------------------------------------------------------------------------------------------------------------------------------------------------------------------------------------------------------------------------------------------------------------------------------------------------------------------------------------------------------------------------------------------------------------------------------------------------------------------------------------------------------------------------------------------------------------------------------------------------------------------------------------------------------------------------------------------------------------------------------------------------------------------------------------------------------------|
|                                                 | <p>AGCTTACGAAGATGCTGAAACTGTTACCGGTGTTATCAACGGCAAAGTTAAGGGCGGCTTCA<br/> CTGTTGAGCTGAACGGTATTCGTGCGTTCCTGCCAGGTTCTCTGGTAGACGTTAAACCGGTG<br/> CGTGACACTCTGCACCTGGAAGGCAAAGAGCTTGAATTTAAAGTAATCAAGCTGGATCAGAA<br/> GCGCAACAACGTTGTTGTTTCTCGTCGTGCCGTTATCGAATCCGAAAACAGCGCAGAGCGCG<br/> ATCAGCTGCTGGAACCTGCAGGAAGGCATGGAAGTTAAAGGTATCGTTAAGAACCTCACT<br/> GACTACGGTGCATTGTTGATCTGGGCGGCGTTGACGGCCTGCTGCACATCACTGACATGGC<br/> CTGGAAACCGGTTAAGCATCCGAGCGAAATCGTCAACGTGGGCGACGAAATCACTGTTAAA<br/> GTGCTGAAGTTCGACCGGAACGTACCCGTGTATCCCTGGGCTGAAACAGCTGGGCGAAG<br/> ATCCGTGGGTAGCTATCGCTAACGTTATCCGGAAGGTACCAAACCTGACTGGTCGCGTGACC<br/> AACCTGACCGACTACGGCTGCTTCGTTGAAATCGAAGAAGGCGTTGAAGGCCTGGTACACGT<br/> TTCCGAAATGGACTGGACCAACAAAACATCCACCCGTCAAAGTTGTTAACGTTGGCGATG<br/> TAGTGAAAGTTATGGTTCTGGATATCGACGAAGAAGTCGTCGTATCTCCCTGGGTCTGAAA<br/> CAGTGCAAAGCTAACCCGTGGCAGCAGTTCGCGGAAACCCACAACAAGGGCGACCGTGTTG<br/> AAGGTAATAATCAAGTCTATCACTGACTTCGGTATCTTCATCGGCTTGGACGGCGGCATCGAC<br/> GGCCTGGTTCACCTGTCTGACATCTCTGGAACGTTGCAGGCGAAGAAGCAGTTCGTGAATA<br/> CAAAAAGGCGACGAAATCGCTGCAGTTGTTCTGCAGTTGACGCAGAACGTGAACGTATCT<br/> CCCTGGGCGTTAAACAGCTCGCAGAAGATCCGTTCAACAACCTGGGTTGCTCTGAACAAGAAA<br/> GGCGCTATCGTAACCGTAAAGTAACTGCAGTTGACGCTAAAGGCGCAACCGTAGAACTGG<br/> CTGACGGCGTTGAAGGTTACCTGCGTGCTTCTGAAGCATCCCGTGACCGCGTTGAAGACGCT<br/> ACCCTGGTCTGAGCGTTGGCGACGAAGTTGAAGCTAAATTCACCGCGTTGATCGTAAAAA<br/> CCGCGCAATCAGCCTGTCTGTTGCTGCGAAAGACGAAGCTGACGAGAAAGATGCAATCGCA<br/> ACTGTTAACAAACAGGAAGATGCAAACCTTCCAACAACGCAATGGCTGAAGCTTCAAAGC<br/> AGCTAAAGGCGAGCTGGTGCCGCGGCGAGCCTCGAG</p>                                                                                                                                                                           |
| <p><b>pTAC-rS1</b><br/> <b>[XhoI, SphI]</b></p> | <p>ATGAAGCTTCCTCGAGAGACTGAATCTTTTGCTCAACTCTTTGAAGAGTCCTTAAAAGAAATCGAAACC<br/> CGCCCGGGTCTATCGTTGCTGGCGTGTGTTGCTATCGACAAAAGACGTAGTACTGGTTGACGCTGGT<br/> CTGAAATCTGAGTCCGCCATCCCGGCTGAGCAGTTCAAAAACGCCAGGGCGAGCTGGAATCCAGGT<br/> AGGTGACGAAGTTGACGTTGCTCTGGACGCAGTAGAAGACGGCTTCGGTGAACCTCTGCTGTCCCGTG<br/> AGAAAGCTAAACGTCACGAAGCCTGGATCAGCTGGA AAAAGCTTACGAAGATGCTGAAACTGTTACC<br/> GGTGTATCAACGGCAAAGTTAAGGGCGGCTTACTGTTGAGCTGAACGGTATTCGTGCGTTCCTGCC<br/> AGGTTCTCTGGTAGACGTTTCGTCGGTGCCTGACTCTGCACCTGGAAGGCAAAGAGCTTGAATTTA<br/> AAGTAATCAAGCTGGATCAGAAGCGCAACAACGTTGTTGTTTCTCGTCGTGCCGTTATCGAATCCGAAA<br/> ACAGCGCAGAGCGGATCAGCTGCTGGAACCTGCAGGAAGGCATGGAAGTTAAAGGTATCGTTAA<br/> GAACCTCACTGACTACGGTGCATTGTTGATCTGGGCGGCGTTGACGGCCTGCTGCACATCACTGACAT<br/> GGCCTGGAACCGGTTAAGCATCCGAGCGAAATCGTCAACGTGGGCGACGAAATCACTGTTAAAGTGC<br/> TGAAGTTCGACCGGAACGTACCCGTGTATCCCTGGGCTGAAACAGCTGGGCGAAGATCCGTGGGTA<br/> GCTATCGCTAAACGTTATCCGGAAGGTACCAAACCTGACTGGTCGCGTGACCAACCTGACCGACTACGG<br/> CTGCTTCGTTGAAATCGAAGAAGGCGTTGAAGGCCTGGTACACGTTTCCGAAATGGACTGGACCAACA<br/> AAAACATCCACCCGTCAAAGTTGTTAACGTTGGCGATGTAGTGGAAGTTATGTTTCTGGATATCGACG<br/> AGAACGTCGTCGTATCTCCCTGGGTCTGAAACAGTGCAAAGCTAACCCGTGGCAGCAGTTCGCGGAA<br/> ACCCACAACAAGGGCGACCGTGTGAAAGTAAAATCAAGTCTATCACTGACTTCGGTATCTTCATCGGC<br/> TTGGACGGCGGCATCGACGGCCTGGTTCACTGTCTGACATCTCCTGGAACGTTGACAGGCGAAGAAGC<br/> AGTTCGTGAATACAAAAAGGCGACGAAATCGCTGCAGTTGTTCTGCAGGTTGACGCAGAACGTGAAC<br/> GTATCTCCCTGGGCGTTAAACAGCTCGCAGAAGATCCGTTCAACAACCTGGGTTGCTCTGAACAAGAAA<br/> GGCGCTATCGTAACCGTAAAGTAACTGCAGTTGACGCTAAAGGCGCAACCGTAGAACTGGCTGACG<br/> GCGTTGAAGGTTACCTGCGTGCTTCTGAAGCATCCCGTGACCGCGTTGAAGACGCTACCCCTGGTCTGA<br/> CGGTTGGCGACGAAGTTGAAGCTAAATTCACCGGCGTTGATCGTAAAAACCGCGCAATCAGCCTGTCT</p> |

|                                     |                                                                                                                                                                                                                                                                                                                               |
|-------------------------------------|-------------------------------------------------------------------------------------------------------------------------------------------------------------------------------------------------------------------------------------------------------------------------------------------------------------------------------|
|                                     | GTTCTGCGAAAGACGAAGCTGACGAGAAAGATGCAATCGCAACTGTTAAACAAACAGGAAGATGCAA<br>ACTTCTCCAACAACGCAATGGCTGAAGCTTCAAAGCAGCTAAAGGCGAGTGCATGCACGTAGAG                                                                                                                                                                                       |
| <b>S1 D1 [NcoI,<br/>XhoI]</b>       | <u>CCATGGAGTCTTAAAGAAATCGAAACCCGCCGGTTCTATCGTTCGTGGCGTTGTTGTTG</u><br>CTATCGACAAAGACGTAGTACTGGTTGACGCTGGTCTGAAATCTGAGTCCGCCATCCCGGCT<br>GAGCAGTTCAAAAACGCCAGGGCGAGCTGAAATCCAGGTAGGTGACGAAGTTGACGTTG<br>CTCTGGACGCAGTAGAAGACGGCTTCGGTGAAACTCTGCTGTCCCGTGAGAAAGCTAAACGT<br>CACGAAGCCCTGGTGCCGCGCGGCAGCCTCGAG                    |
| <b>S1 D2 [NcoI,<br/>XhoI]</b>       | <u>CCATGGCCTGGATCACGCTGGAAAAAGCTTACGAAGATGCTGAAACTGTTACCGGTGTTATC</u><br>AACGGCAAAGTTAAGGGCGGCTTCACTGTTGAGCTGAACGGTATTCGTGCGTTCCTGCCAGG<br>TTCTCTGGTAGACGTTCCGCGTGCGTGACACTCTGCACCTGGAAGGCAAAGAGCTTGAAT<br>TTAAAGTAATCAAGCTGGATCAGAAGCGCAACAACGTTGTTGTTTCTCGTCGTGCCGTTATCG<br>AATCCGAAAAACAGCGCAGAGCTGGTGCCGCGCGGCAGCCTCGAG   |
| <b>S1 D2 R139A<br/>[NcoI, XhoI]</b> | <u>CCATGGCCTGGATCACGCTGGAAAAAGCTTACGAAGATGCTGAAACTGTTACCGGTGTTATC</u><br>AACGGCAAAGTTAAGGGCGGCTTCACTGTTGAGCTGAACGGTATTCGTGCGTTCCTGCCAGG<br>TTCTCTGGTAGACGTTGCCCGGTGCGTGACACTCTGCACCTGGAAGGCAAAGAGCTTGAAT<br>TTAAAGTAATCAAGCTGGATCAGAAGCGCAACAACGTTGTTGTTTCTCGTCGTGCCGTTATCG<br>AATCCGAAAAACAGCGCAGAGCTGGTGCCGCGCGGCAGCCTCGAG  |
| <b>S1 D2 R139K<br/>[NcoI, XhoI]</b> | <u>CCATGGCCTGGATCACGCTGGAAAAAGCTTACGAAGATGCTGAAACTGTTACCGGTGTTATC</u><br>AACGGCAAAGTTAAGGGCGGCTTCACTGTTGAGCTGAACGGTATTCGTGCGTTCCTGCCAGG<br>TTCTCTGGTAGACGTTAAACCGGTGCGTGACACTCTGCACCTGGAAGGCAAAGAGCTTGAAT<br>TTAAAGTAATCAAGCTGGATCAGAAGCGCAACAACGTTGTTGTTTCTCGTCGTGCCGTTATCG<br>AATCCGAAAAACAGCGCAGAGCTGGTGCCGCGCGGCAGCCTCGAG |
| <b>S1 D3 [NcoI,<br/>XhoI]</b>       | <u>CCATGGCCCCGCGATCAGCTGCTGGAAAACCTGCAGGAAGGCATGGAAGTTAAAGGTATCGT</u><br>TAAGAACCTCACTGACTACGGTGCAATTCGTTGATCTGGGCGGCGTTGACGGCCTGCTGCACA<br>TCACTGACATGGCCTGGAAACGCGTTAAGCATCCGAGCGAAATCGTCAACGTGGGCGACGA<br>AATCACTGTTAAAGTGCTGAAGTTTCGACCGCGAACGTACCCGTGTATCCCTGGGCCTGAAAC<br>AGCTGGGCGAAGATCCGCTGGTGCCGCGCGGCAGCCTCGAG     |
| <b>S1 D4 [NcoI,<br/>XhoI]</b>       | <u>CCATGGCCTGGGTAGCTATCGCTAAACGTTATCCGGAAGGTACCAAACCTGACTGGTCGCGTG</u><br>ACCAAACCTGACCGACTACGGCTGCTTCGTTGAAATCGAAGAAGGCGTTGAAGGCCTGGTACA<br>CGTTTCCGAAATGGACTGGACCAACAAAACATCCACCCGTCCAAGTTGTTAACGTTGGCG<br>ATGTAGTGGAAGTTATGGTTCTGGATATCGACGAAGAACGTCGTCGTATCTCCCTGGGTCTG<br>AAACAGTGCAAAGCTAACCCGCTGGTGCCGCGCGGCAGCCTCGAG  |
| <b>S1 D5 [NcoI,<br/>XhoI]</b>       | <u>CCATGGCCTGGCAGCAGTTCGCGGAAACCCACAACAAGGGCGACCGTGTGAAGGTTAAAT</u><br>CAAGTCTATCACTGACTTCGGTATCTTCATCGGCTTGACGGCGGCATCGACGGCCTGGTTCA<br>CCTGTCTGACATCTCCTGGAACGTTGCAGGCGAAGAAGCAGTTTCGTGAATACAAAAAGGCG<br>ACGAAATCGCTGCAGTTGTTCTGCAGGTTGACGCAGAACGTGAACGTATCTCCCTGGGCGTT<br>AAACAGCTCGCAGAAGATCCGCTGGTGCCGCGCGGCAGCCTCGAG    |
| <b>S1 D6 [NcoI,<br/>XhoI]</b>       | <u>CCATGGCCTTCAACAACCTGGGTTGCTCTGAACAAGAAAGGCGCTATCGTAACCGGTAAAGTA</u><br>ACTGCAGTTGACGCTAAAGGCGCAACCGTAGAACTGGCTGACGGCGTTGAAGGTTACCTGC<br>GTGCTTCTGAAGCATCCCGTGACCGGTTGAAGACGCTACCCTGGTTCTGAGCGTTGGCGAC                                                                                                                      |

|                                                 |                                                                                                                                                                                                                                                                                                                                                                                                                                                                                                                                                                                                                                                                                                                                                                                                                                                                                                                                                                                                                                                                                                                                                                                                              |
|-------------------------------------------------|--------------------------------------------------------------------------------------------------------------------------------------------------------------------------------------------------------------------------------------------------------------------------------------------------------------------------------------------------------------------------------------------------------------------------------------------------------------------------------------------------------------------------------------------------------------------------------------------------------------------------------------------------------------------------------------------------------------------------------------------------------------------------------------------------------------------------------------------------------------------------------------------------------------------------------------------------------------------------------------------------------------------------------------------------------------------------------------------------------------------------------------------------------------------------------------------------------------|
|                                                 | GAAGTTGAAGCTAAATTCACCGGCGTTGATCGTAAAAACCGCGCAATCAGCCTGTCTGTTCCG<br>TGCGAAAGACGAAGCTGACGAGAACTGGTGCCGCGCGGCAGCCTCGAG                                                                                                                                                                                                                                                                                                                                                                                                                                                                                                                                                                                                                                                                                                                                                                                                                                                                                                                                                                                                                                                                                          |
| <b>S1 domain<br/>of PNPase<br/>[NcoI, XhoI]</b> | <u>CCATGGCAGAAATCGAAGTGGGCGCGTCTACACTGGTAAAGTGACCCGTATCGTTGACTTT</u><br>GGCGCATTGTTGCCATCGGCGGCGGTAAAGAAGGTCTGGTCCACATCTCTCAAATCGCTGA<br>CAAACGCGTTGAGAAAGTGACCGATTACCTGCAGATGGGTGAGGAAGTACCGGTGAAAGTT<br>CTGGAAGTTGATCGCCAGGGCCGTATCCGTCTGAGCATTAAAGAAGCGACTGAGCAGTCTCA<br>ACCTGCTGCACTGGTGCCGCGCGGCAGCCTCGAG                                                                                                                                                                                                                                                                                                                                                                                                                                                                                                                                                                                                                                                                                                                                                                                                                                                                                               |
| <b>pET28 ARH1<br/>[NcoI, XhoI]</b>              | <u>CCATGGAAAAATACGTCGCCGCGATGGTTTTGTCAGCTGCTGGCGATGCTTTGGGATATTAT</u><br>AATGGAAAGTGGGAATTTCTCAGGACGGGGAGAAAATTCATCGTCAACTGGCTCAATTAGG<br>GGGGCTGGATGCTCTGGACGTTGGCCGTTGGCGTGTGTCTGATGATACTGTCATGCACTTGG<br>CAACAGCCGAGGCTTTGGTCGAGGCCGAAAGGCTCCAAAAGTACTGACTCAGCTTTATTATTG<br>TTAGCCAAGCACTATCAGGATTGCATGGAAGATATGGACGGTCGCGCACCCGGGGTGCCT<br>CTGTACACAACGCGATGCAGCTTAAACCTGGGAAACCGAATGGCTGGCGTATCCCATTTAAC<br>TCGCATGAAGGAGGGTGTGGCGCGCGATGCGCGCGATGTGTATCGGTTTGCCTTTCCGC<br>ATCACTCTCAATTAGACACACTGATCCAAGTATCGATCGAGTCAGGACGTATGACCCATCATC<br>ACCCGACAGGGTACCTTGGCGCACTTGCCTCCGCCTTATTCACGGCCTATGCGGTAAATAGCC<br>GCCCTCCATTGCAGTGGGGTAAGGGACTTATGGAGCTTTTCCAGAGGCTAAAAAATACATT<br>GTCCAATCCGGGTACTTTGTGGAAGAAAATTTACAGCATTGGTCTTATTTCAAACGAAGTGG<br>GAAAATATCTTAAACTGCGTGGAAATCTTGACGGCGAGAGTGCTCCAACATCCCTGAATCT<br>TTTGGCGTTAAAGAGCGCGACCAGTTCTACACTTCGTTGTCATATAGTGGCTGGGGCGGTTT<br>ATCTGGGCATGATGCCCCATGATCGCGTATGACGCGGTGCTGGCGGCGGGAGACTCCTGG<br>AAAGAGCTTGCACCCGCGCCTTCTTTCACGGAGGTGACTCGGATTCGACCCGAGCCATTGC<br>TGGATGTTGGTGGGGCGTCATGTACGGATTTAAGGGCGTCAGCCCCAGCAACTACGAAAAA<br>TTAGAGTATCGCAATCGCCTTGAGGAAACAGCTCGCGCACTTTACTCGCTGGGTAGTAAAGA<br>AGACACTGTTATCTCGCTGCTGGTGCCGCGCGGCAGCCTCGAG  |
| <b>pET ARH1<br/>D55A, D56A<br/>[NcoI, XhoI]</b> | <u>CCATGGAAAAATACGTCGCCGCGATGGTTTTGTCAGCTGCTGGCGATGCTTTGGGATATTAT</u><br>AATGGAAAGTGGGAATTTCTCAGGACGGGGAGAAAATTCATCGTCAACTGGCTCAATTAGG<br>GGGGCTGGATGCTCTGGACGTTGGCCGTTGGCGTGTGTCTGCGGGCGACTGTCATGCACTTGG<br>CAACAGCCGAGGCTTTGGTCGAGGCCGAAAGGCTCCAAAAGTACTGACTCAGCTTTATTATTG<br>TTAGCCAAGCACTATCAGGATTGCATGGAAGATATGGACGGTCGCGCACCCGGGGTGCCT<br>CTGTACACAACGCGATGCAGCTTAAACCTGGGAAACCGAATGGCTGGCGTATCCCATTTAAC<br>TCGCATGAAGGAGGGTGTGGCGCGCGATGCGCGCGATGTGTATCGGTTTGCCTTTCCGC<br>ATCACTCTCAATTAGACACACTGATCCAAGTATCGATCGAGTCAGGACGTATGACCCATCATC<br>ACCCGACAGGGTACCTTGGCGCACTTGCCTCCGCCTTATTCACGGCCTATGCGGTAAATAGCC<br>GCCCTCCATTGCAGTGGGGTAAGGGACTTATGGAGCTTTTCCAGAGGCTAAAAAATACATT<br>GTCCAATCCGGGTACTTTGTGGAAGAAAATTTACAGCATTGGTCTTATTTCAAACGAAGTGG<br>GAAAATATCTTAAACTGCGTGGAAATCTTGACGGCGAGAGTGCTCCAACATCCCTGAATCT<br>TTTGGCGTTAAAGAGCGCGACCAGTTCTACACTTCGTTGTCATATAGTGGCTGGGGCGGTTT<br>ATCTGGGCATGATGCCCCATGATCGCGTATGACGCGGTGCTGGCGGCGGGAGACTCCTGG<br>AAAGAGCTTGCACCCGCGCCTTCTTTCACGGAGGTGACTCGGATTCGACCCGAGCCATTGC<br>TGGATGTTGGTGGGGCGTCATGTACGGATTTAAGGGCGTCAGCCCCAGCAACTACGAAAAA<br>TTAGAGTATCGCAATCGCCTTGAGGAAACAGCTCGCGCACTTTACTCGCTGGGTAGTAAAGA<br>AGACACTGTTATCTCGCTGCTGGTGCCGCGCGGCAGCCTCGAG |

|                                                |                                                                                                                                                                                                                                                                                                                                                                                                                                                                                                                                                                                                                                                                                                                                                                                                                                                                                                                                                                |
|------------------------------------------------|----------------------------------------------------------------------------------------------------------------------------------------------------------------------------------------------------------------------------------------------------------------------------------------------------------------------------------------------------------------------------------------------------------------------------------------------------------------------------------------------------------------------------------------------------------------------------------------------------------------------------------------------------------------------------------------------------------------------------------------------------------------------------------------------------------------------------------------------------------------------------------------------------------------------------------------------------------------|
| <p><b>pET rL2</b><br/> <b>[NcoI, XhoI]</b></p> | <p><u>CCATGGGCGCAGTTGTTAAATGTAAACCGACATCTCCGGGTCGTCGCCACGTAGTTAAAGTG</u><br/> GTTAACCTGAGCTGCACAAGGGCAAACCTTTTGCTCCGTTGCTGGAAAAAACAGCAAATC<br/> CGGTGGTCGTAACAACAATGGCCGTATCACCCTCGTCATATCGGTGGTGGCCACAAGCAGG<br/> CTTACCGTATTGTTGACTTCAAACGCAACAAAGACGGTATCCCGGCAGTTGTTGAACGTCTTG<br/> AGTACGATCCGAACCGTTCCGCGAACATCGCGCTGGTTCTGTACAAAGACGGTGAACGCCGT<br/> TACATCCTGGCCCCTAAAGGCCTGAAAGCTGGCGACCAGATTCAGTCTGGCGTTGATGCTGC<br/> AATCAAACCAGGTAACACCCTGCCGATGCGCAACATCCCGTTGGTTCTACTGTTCATAACGT<br/> AGAAATGAAACCAGGTAAGGCGGTGAGCTGGCACGTTCCGCTGGTACTTACGTTCAGATCG<br/> TTGCTCGTGATGGTGCTTATGTCACCCTGCGTCTGCGTTCTGGTGAAATGCGTAAAGTAGAAG<br/> CAGACTGCCGTGCAACTCTGGGCGAAGTTGGCAATGCTGAGCATATGCTGCGCGTTCTGGGT<br/> AAAGCAGGTGCTGCACGCTGGCGTGGTGTTTCGTCGACCGTTGCGGGTACCGCGATGAACCC<br/> GGTAGACCACCCACATGGTGGTGGTGAAGTTCGTAACCTTTGGTAAGCACCCGGTAACTCCGT<br/> GGGGCGTTCAGACCAAAGGTAAGAAGACCCGCGAGCAACAAGCGTACTGATAAATTCATCGT<br/> ACGTCGCCGTAGCAA<u>ACTCGAG</u></p> |
|------------------------------------------------|----------------------------------------------------------------------------------------------------------------------------------------------------------------------------------------------------------------------------------------------------------------------------------------------------------------------------------------------------------------------------------------------------------------------------------------------------------------------------------------------------------------------------------------------------------------------------------------------------------------------------------------------------------------------------------------------------------------------------------------------------------------------------------------------------------------------------------------------------------------------------------------------------------------------------------------------------------------|

**Supplementary Table 9: Primers used in this study.** Corresponding restriction site in bold, underlined; mutation in bold and red

| Primer            | Sequence (5' to 3')                                                              |
|-------------------|----------------------------------------------------------------------------------|
| Fwd Q $\beta$ T7  | TAATACGACTCACTATTATCTTGATACTACCTTTAG                                             |
| Rev Q $\beta$     | CATGATCAAATTGACCCAAAGTTTCAACGCTTTACGCG                                           |
| Fwd RNAI T7       | TAATACGACTCACTATAACAGTATTTGGTATC                                                 |
| Rev RNAI          | ACAAAAAACCACCGCTACCAGCGGTGGTTTGTGGCC                                             |
| Fwd Alt NcoI      | ATCGAC <b><u>CCATGG</u></b> GAGAACTTATTACAGAATTATTTGACG                          |
| Rev Alt XhoI      | ATTCGAC <b><u>CTCGAG</u></b> GCTGCCGCGCGGCACCAGTCCTTGAACGAACTTGTAAGGCA<br>TG     |
| Fwd ModA NcoI     | ATCGAC <b><u>CCATGG</u></b> GAAAATACTCAGTAATGCAACTAAAAG                          |
| Rev ModA XhoI     | ATCGTAC <b><u>CTCGAG</u></b> GCTGCCGCGCGGCACCAGTAGATTAAATCCTTCAAATCAA<br>G       |
| Fwd ModB NcoI     | ATCGAC <b><u>CCATGG</u></b> GAAATTATTAATCTTGCAGATGTTG                            |
| Rev ModB XhoI     | ACTTAG <b><u>CTCGAG</u></b> GCTGCCGCGCGGCACCAGTTCAACTACCTCAATATCATAAAC           |
| Fwd rS1 NcoI      | ATCGAC <b><u>CCATGG</u></b> GAACTGAATCTTTTGCTCAACTCTTTGAAGAGTCC                  |
| Rev rS1 XhoI      | ATTCGAC <b><u>CTCGAG</u></b> GCTGCCGCGCGGCACCAGCTCGCCTTTAGCTGCTTTG               |
| Fwd rS1-pTAC XhoI | ATGAAGCTT <b><u>CTCGAG</u></b> AGACTGAATCTTTTGCTCAACTCTTTGAAGAGTCC               |
| Rev rS1-pTAC SphI | CTCTACGT <b><u>GCATGC</u></b> ACTCGCCTTTAGCTGCTTTGAAAGCTTCAGCC                   |
| Fwd NcoI rS1 D1   | ATCGAC <b><u>CCATGG</u></b> AGTCCTTAAAAGAAATCGAAACCCGCCGGG                       |
| Rev XhoI rS1 D1   | TGGTG <b><u>CTCGAG</u></b> GCTGCCGCGCGGCACCAGGGCTTCGTGACGTTTAGCTTTCTC<br>ACGGG   |
| Fwd NcoI rS1 D2   | ATCGAC <b><u>CCATGG</u></b> CCTGGATCACGCTGGAAAAGCTTACGAAGATGCTGAAAC              |
| Rev XhoI rS1 D2   | GGTG <b><u>CTCGAG</u></b> GCTGCCGCGCGGCACCAGCTCTGCGCTGTTTTCGGATTCGATA<br>ACGGCAC |
| Fwd NcoI rS1 D3   | ATCGAC <b><u>CCATGG</u></b> CCCGGATCAGCTGCTGGAAAACCTGCAGGAAGG                    |
| Rev XhoI rS1 D3   | TGGTG <b><u>CTCGAG</u></b> GCTGCCGCGCGGCACCAGCGGATCTTCGCCAGCTGTTTCAG<br>GCCAGG   |
| Fwd NcoI rS1 D4   | ATCGAC <b><u>CCATGG</u></b> CCTGGGTAGCTATCGCTAAACGTTATCCGGAAGG                   |

|                                        |                                                                                 |
|----------------------------------------|---------------------------------------------------------------------------------|
| Rev XhoI rS1 D4                        | TGGTG <b>CTCGAG</b> GCTGCCGCGCGGCACCAGCGGGTTAGCTTTGCACTGTTTCAG<br>ACCCAGGGAG    |
| Fwd NcoI rS1 D5                        | ATCGAC <b>CCATGG</b> CCTGGCAGCAGTTCGCGGAAACCCACAACAAGGGCGACCG<br>TGTTG          |
| Rev XhoI S1 D5                         | TGGTG <b>CTCGAG</b> GCTGCCGCGCGGCACCAGCGGATCTTCTGCGAGCTGTTAAC<br>GCCAGGGAGATACG |
| Fwd NcoI rS1 D6                        | ATCGAC <b>CCATGG</b> CCTTCAACAACCTGGGTTGCTCTGAACAAGAAAGGCGCTATC<br>G            |
| Rev XhoI rS1 D6                        | TGGTG <b>CTCGAG</b> GCTGCCGCGCGGCACCAGTTTCTCGTCAGCTTCGTCTTTGCA<br>CGAACAGACAGG  |
| Fwd NcoI PNPase rS1<br>binding         | ATCGAC <b>CCATGG</b> CAGAAATCGAAGTGGCCGCGTCTACACTGGTAAAGTGACC<br>CG             |
| Rev XhoI PNPase rS1<br>binding         | TGGTG <b>CTCGAG</b> GCTGCCGCGCGGCACCAGTGCAGCAGGTTGAGACTGCTCAG<br>TCGCTTC        |
| Fwd ARH1 NcoI                          | TGCAG <b>CCATGG</b> AAAAATACGTCGCCGCGATG                                        |
| Rev ARH1 XhoI                          | GTGGTG <b>CTCGAG</b> GCTGCCGCGCGGCACCAG                                         |
| Fwd rS1 R139A                          | CTGGTAGACGTT <b>CCCC</b> GGTGCCTGACACTC                                         |
| Fwd rS1 R139K                          | CTGGTAGACGTT <b>AAA</b> CCGGTGCCTGACACTC                                        |
| Rev rS1 R139                           | AGAACCTGGCAGGAACGCACGAATACCG                                                    |
| Fwd ARH1 D55,56A                       | GGCCGTTGGCGTGTGTCT <b>CGGGC</b> ACTGTCATGCACTTGGC                               |
| Rev ARH1 D55,56A                       | AACGTCCAGAGCATCCAGCCCCCTAA                                                      |
| Fwd ModB R73A                          | CCTTATCAATTATAT <b>GCG</b> GGTATATCAAATCG                                       |
| Rev ModB R73A                          | CGATTTAGTTAAATGCTTTTTAATGATTC                                                   |
| Fwd ModB G74A                          | GACAAAAGAACTCATTAAAGATTTAC                                                      |
| Rev ModB G74A                          | GATTTTGATAT <b>TGCCG</b> CATATAATTGATAAGGCG                                     |
| Fwd ModB DS_SPCas                      | AATTATATCGGTTTTAGAGCTATGCTGTTTTGAATGGTCC                                        |
| Rev ModB DS_SPCas                      | GATAAGGCGAGCTAGCACTGTACCTAGGACTGAGC                                             |
| Fwd ModB<br>amplification T4<br>genome | CCAAGAATGGTCATCTGGTTTATTAG                                                      |

|                                  |                                                              |
|----------------------------------|--------------------------------------------------------------|
| Rev ModB amplification T4 genome | CCGCCTGGGCTCCCTGG                                            |
| Fwd sequencing ModB T4 genome    | CAGTTATCTATAAAAGCTGAAAG                                      |
| Rev sequencing ModB T4 genome    | CTTTCCAATTGGAATCATCCATTC                                     |
| rpsA homologous downstream fwd   | TTCTCTGACTCTTCGGGATTTTTATTC                                  |
| rpsA homologous downstream rev   | AGGCAAATTAAGCGGCTGCTG                                        |
| Terminator region fwd            | TTCTCTGACTCTTCGGGATTTTTATTC                                  |
| Terminator region rev            | AGGACGAAACCTGCAATCTGTC                                       |
| FRT pKD4 fwd                     | TCGGAATAAAAATCCCGAAGAGTCAGAGAAGTCCATATGAATATCCTCCTTAG<br>TTC |
| FRT pKD4 rev                     | GTTTACTTGACAGATTGCAGGTTTCGTCCTGTGTAGGCTGGAGCTGCTTC           |
| 5_70 left rev rpsA               | AGGACGAAACCTGCAATCTGTC                                       |
| 5_fwd_rS1 amplification          | GGCGTTGATCGTAAAAACCGC                                        |
| Fwd NcoI rL2                     | <b>CCATGG</b> GCGCAGTTGTAAATGTAAACCG                         |
| Rev XhoI rL2                     | <b>CTCGAG</b> TTTGCTACGGCGACGTACGATG                         |
| adenylated RNA-3'-adapter        | /5rApp/CNNNNNNAGATCGGAAGAGCACACGTCTG/3SpC3/                  |
| RT primer                        | CAGACGTGTGCTCTTCCGAT                                         |
| cDNA anchor fwd                  | ACACGACGCTCTTCCGATCTGGG                                      |
| cDNA anchor rev                  | /5Phos/CAGATCGGAAGAGCGTCGTGTCCC/3SpC3/                       |
| qPCR acpP fwd                    | CGTGGTAAGACCTGCCGG                                           |
| qPCR acpP rev                    | CTCAACGGTGTCAAGAGAATCCAAAAC                                  |

|               |                           |
|---------------|---------------------------|
| qPCR gadY fwd | GAGCACAAAGTTTCCCGTGC      |
| qPCR gadY rev | AAACCCGGCATAGGGGACC       |
| qPCR mcaS fwd | AAAATAGAGTCTGTGACATCCGC   |
| qPCR mcaS rev | CACCGGCGCAGAGGAGAC        |
| qPCR oxyS fwd | AAAAGCGGATCCTGGAGATCC     |
| qPCR oxyS rev | GAAACGGAGCGGCACCTC        |
| qPCR rnaC fwd | CGTTGCGGCAACCTTGTC        |
| qPCR rnaC rev | AAAAATATTGAGTAGCGTCAACTAC |



**Supplementary Table 10: Strains and plasmids used in this study.**

| <b>Name</b>                                                             | <b>Description</b>                                                                                            | <b>Reference or resource</b>                                                                   |
|-------------------------------------------------------------------------|---------------------------------------------------------------------------------------------------------------|------------------------------------------------------------------------------------------------|
| <b><i>E. coli</i> strain B</b>                                          | <i>E. coli</i> strain applied for bacteriophage T4 infection                                                  | DMSZ, <i>Escherichia coli</i> (Migula 1895) Castellani and Chalmers 1919 (DSM 613, ATCC 11303) |
| <b><i>E. coli</i> strain B pTAC rS1</b>                                 | <i>E. coli</i> strain B expressing His-tagged rS1 under the control of <i>E. coli</i> RNA polymerase promoter | This study                                                                                     |
| <b><i>E. coli</i> BL21 (DE3) pET16 RNase E (1-529)</b>                  | <i>E. coli</i> strain expressing His-tagged catalytic domain of RNase E (1-529)                               | Plasmid was a kind gift from Prof. Dr. Ben Luisi <sup>67</sup>                                 |
| <b><i>E. coli</i> BL21 (DE3) pET 28 NudC V157A, E174A, E177A, E178A</b> | <i>E. coli</i> strain expressing His-tagged inactive Mutant of NudC                                           | <sup>68</sup>                                                                                  |
| <b><i>E. coli</i> BL21 (DE3) pET 28 rS1</b>                             | <i>E. coli</i> strain expressing His-tagged rS1                                                               | This study                                                                                     |
| <b><i>E. coli</i> BL21 (DE3) pET 28 rS1 R139K</b>                       | <i>E. coli</i> strain expressing His-tagged rS1 R139K variant                                                 | This study                                                                                     |
| <b><i>E. coli</i> BL21 (DE3) pET 28 rS1 R139A</b>                       | <i>E. coli</i> strain expressing His-tagged rS1 R139A variant                                                 | This study                                                                                     |
| <b><i>E. coli</i> BL21 (DE3) pET 28 rS1 D1</b>                          | <i>E. coli</i> strain expressing His-tagged rS1 D1                                                            | This study                                                                                     |
| <b><i>E. coli</i> BL21 (DE3) pET 28 rS1 D2</b>                          | <i>E. coli</i> strain expressing His-tagged rS1 D2                                                            | This study                                                                                     |
| <b><i>E. coli</i> BL21 (DE3) pET 28 rS1 D2 R139K</b>                    | <i>E. coli</i> strain expressing His-tagged rS1 D2 R139K                                                      | This study                                                                                     |
| <b><i>E. coli</i> BL21 (DE3) pET 28 rS1 D2 R139A</b>                    | <i>E. coli</i> strain expressing His-tagged rS1 D2 R139A                                                      | This study                                                                                     |
| <b><i>E. coli</i> BL21 (DE3) pET 28 rS1 D3</b>                          | <i>E. coli</i> strain expressing His-tagged rS1 D3                                                            | This study                                                                                     |
| <b><i>E. coli</i> BL21 (DE3) pET 28 rS1 D4</b>                          | <i>E. coli</i> strain expressing His-tagged rS1 D4                                                            | This study                                                                                     |
| <b><i>E. coli</i> BL21 (DE3) pET 28 rS1 D5</b>                          | <i>E. coli</i> strain expressing His-tagged rS1 D5                                                            | This study                                                                                     |

|                                                                                 |                                                                                                 |                                                              |
|---------------------------------------------------------------------------------|-------------------------------------------------------------------------------------------------|--------------------------------------------------------------|
| <b><i>E. coli</i> BL21 (DE3) pET 28 rS1 D6</b>                                  | <i>E. coli</i> strain expressing His-tagged rS1 D6                                              | This study                                                   |
| <b><i>E. coli</i> BL21 (DE3) pET 28 Alt</b>                                     | <i>E. coli</i> strain expressing His-tagged Alt                                                 | This study                                                   |
| <b><i>E. coli</i> BL21 (DE3) pET 28 ModA</b>                                    | <i>E. coli</i> strain expressing His-tagged ModA                                                | This study                                                   |
| <b><i>E. coli</i> BL21 (DE3) pET 28 ModB</b>                                    | <i>E. coli</i> strain expressing His-tagged ModB                                                | This study                                                   |
| <b><i>E. coli</i> BL21 (DE3) pET 28 ModB R73A, G74A</b>                         | <i>E. coli</i> strain expressing His-tagged ModB with point mutations R73A and G74A             | This study                                                   |
| <b><i>E. coli</i> BL21 (DE3) pET 28 NudC</b>                                    | <i>E. coli</i> strain expressing His-tagged NudC                                                | <sup>68</sup>                                                |
| <b><i>E. coli</i> BL21 (DE3) pET 28 PNPase S1 domain</b>                        | <i>E. coli</i> strain expressing His-tagged PNPase S1 domain                                    | This study                                                   |
| <b><i>E. coli</i> BL21 (DE3) pET 28 ARH1</b>                                    | <i>E. coli</i> strain expressing His-tagged ARH1                                                | This study                                                   |
| <b><i>E. coli</i> BL21 (DE3) pET 28 ARH1 D55A, D56A</b>                         | <i>E. coli</i> strain expressing His-tagged ARH1 D55A, D56A                                     | This study                                                   |
| <b><i>E. coli</i> DH<math>\alpha</math> DS_SPCas_ModB</b>                       | <i>E. coli</i> strain expressing CRISPR-Cas9 system for cleavage of <i>modB</i>                 | This study                                                   |
| <b><i>E. coli</i> DH<math>\alpha</math> DS_SPCas_ModB pET28 ModB R73A, G74A</b> | <i>E. coli</i> strain for editing of <i>modB</i> within T4 phage genome                         | This study                                                   |
| <b><i>E. coli</i> BL21 (DE3) pET28 rL2</b>                                      | <i>E. coli</i> strain expressing His-tagged rL2                                                 | This study                                                   |
| <b><i>E. coli</i> B strain with endogenously His-tagged rS1</b>                 | <i>E. coli</i> strain with endogenous expression of rS1 with a His-tag fusion at the C-terminus | This study                                                   |
| <b>T4 WT</b>                                                                    | Wild-type bacteriophage T4                                                                      | Escherichia phage T4, DSM 4505, DSMZ, Braunschweig, Germany) |
| <b>T4 ModB R73A, G74A</b>                                                       | T4 phage mutant carrying inactive ModB version ModB R73A, G74A                                  | This study                                                   |

## References

- 63 Jumper, J. *et al.* Highly accurate protein structure prediction with AlphaFold. *Nature* **596**, 583-589 (2021). <https://doi.org:10.1038/s41586-021-03819-2>
- 67 Callaghan, A. J. *et al.* Structure of Escherichia coli RNase E catalytic domain and implications for RNA turnover. *Nature* **437**, 1187-1191 (2005). <https://doi.org:10.1038/nature04084>
- 68 Cahova, H., Winz, M. L., Höfer, K., Nübel, G. & Jäschke, A. NAD captureSeq indicates NAD as a bacterial cap for a subset of regulatory RNAs. *Nature* **519**, 374-377 (2015). <https://doi.org:10.1038/nature14020>
